# Supplementary material for: Selective anisotropic growth of Bi2S3 nanoparticles with adjustable optical properties
Source: Royal Society of Chemistry journal article supplement (doi:10.1039/d2cp05437j), 2022-12-20
Supplement: d2cp05437j1.pdf [file d2cp05437j1.pdf]

# Supporting Information

## Selective anisotropic growth of $\text{Bi}_2\text{S}_3$ nanoparticles with adjustable optical properties

Mariona Escoda-Torroella,<sup>1,2</sup> Carlos Moya,<sup>1,2,\*</sup> José A. Ruiz-Torres<sup>1,2</sup>, Arantxa Fraile Rodríguez,<sup>1,2</sup>  
Amílcar Labarta,<sup>1,2</sup> and Xavier Batlle<sup>1,2,\*</sup>

<sup>1</sup>Departament de Física de la Matèria Condensada, Martí i Franquès 1, 08028 Barcelona, Spain

<sup>2</sup>Institut de Nanociència i Nanotecnologia, Universitat de Barcelona, 08028 Barcelona, Spain

\*Corresponding author: [carlosmoyaalvarez@ub.edu](mailto:carlosmoyaalvarez@ub.edu), [xavierbatlle@ub.edu](mailto:xavierbatlle@ub.edu)

### Table of contents

**Figure S1.** Profiles of the reaction temperature for the series of samples  $S_{105}$  and  $S_{165}$ .

**Figure S2.** Particle size distributions of the series of samples  $S_{105}$  and  $S_{165}$ , obtained by transmission electron microscopy (TEM).

**Table S1.** Structural features of the series of samples  $S_{105}$  and  $S_{165}$ .

**Figure S3.** Selected area electron diffraction (SAED) pattern for sample  $S_{165}0$  indexed to the  $\text{Bi}_2\text{S}_3$  phase.

**Table S2.** Interplanar distances for sample  $S_{165}0$  computed from SAED images.

**Figure S4.** Multiple peak fitting of the X-ray diffraction spectra (XRD) for samples  $S_{105}120$  and  $S_{165}120$ .

**Table S3.** Crystal plane indexation and mean particle diameter obtained from XRD ( $D_{XRD}$ ) spectra for samples  $S_{105}120$  and  $S_{165}120$ .

**Figure S5.** Schematic illustration of the major planes in a  $\text{Bi}_2\text{S}_3$  nanorod (NR).

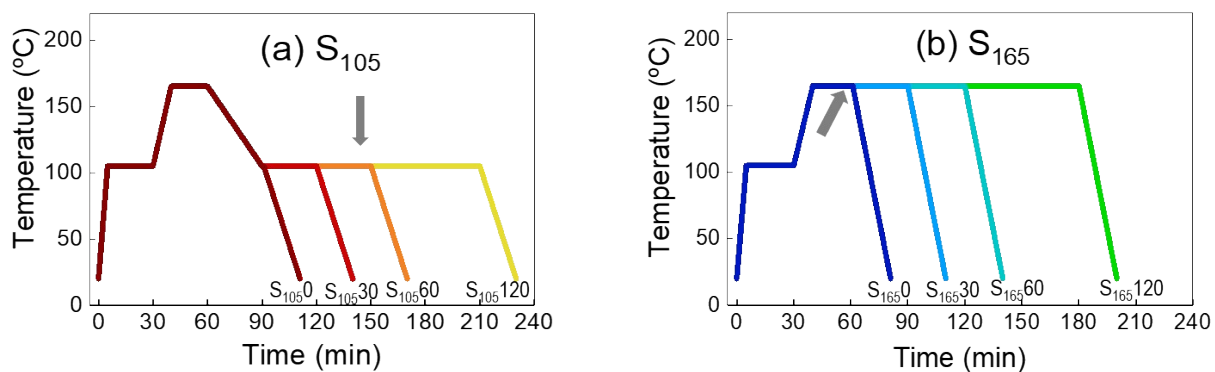

Figure S1. Reaction temperature profiles for series of samples (a)  $S_{105}$  and (b)  $S_{165}$ . Grey arrows are signaling the injection time of the thioacetamide mixture.

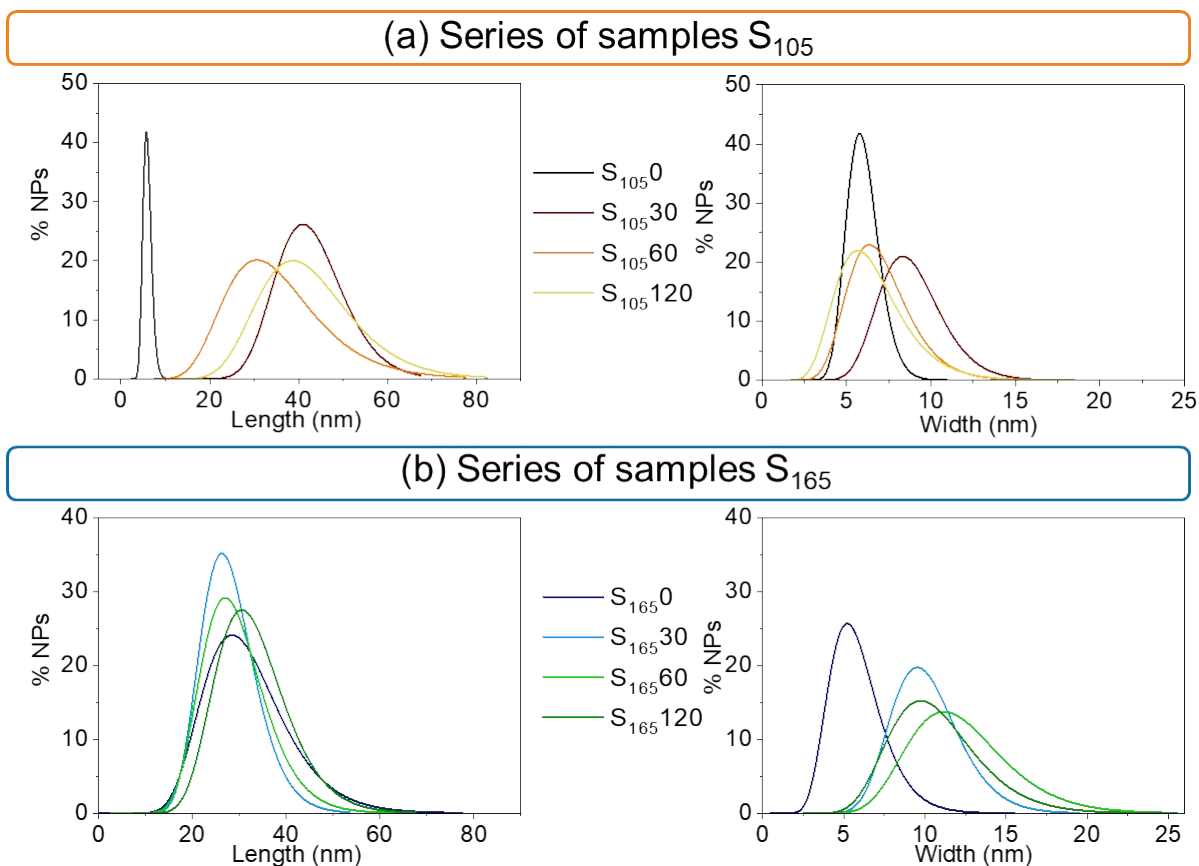

Figure S2. Particle length (left) and width (right) distributions obtained by fitting TEM histograms to log-normal distributions for the series of samples (a)  $S_{105}$  and (b)  $S_{165}$ , for times ranging from 0 to 120 min.

| Sample               | Morphology | Width (nm)<br>$W_{TEM} \pm \sigma$ (RSD) | Length (nm)<br>$L_{TEM} \pm \sigma$ (RSD) | Ratio<br>(W:L) | $\eta$ (%) |
|----------------------|------------|------------------------------------------|-------------------------------------------|----------------|------------|
| S <sub>105</sub> 0   | Spheroid   | 5.9 ± 0.8 (14%)                          | 5.9 ± 0.8 (14%)                           | 1:1            | 15.4       |
| S <sub>105</sub> 30  | Needle     | 8.9 ± 1.9 (21%)                          | 43 ± 8 (19%)                              | 1:5            | 21.5       |
| S <sub>105</sub> 60  | Needle     | 7.7 ± 1.4 (18%)                          | 46 ± 6 (13%)                              | 1:6            | 35.2       |
| S <sub>105</sub> 120 | Needle     | 6.0 ± 2.0 (33%)                          | 43 ± 11 (26%)                             | 1:7            | 43.7       |
| S <sub>165</sub> 0   | Rod        | 5.9 ± 1.7 (28%)                          | 32 ± 9 (28%)                              | 1:5            | 39.1       |
| S <sub>165</sub> 30  | Rod        | 10.2 ± 2.2 (22%)                         | 28 ± 6 (21%)                              | 1:3            | 45.9       |
| S <sub>165</sub> 60  | Rod        | 13 ± 3 (23%)                             | 29 ± 7 (24%)                              | 1:3            | 32.2       |
| S <sub>165</sub> 120 | Rod        | 11 ± 3 (26%)                             | 33 ± 8 (24%)                              | 1:3            | 41.0       |

Table S1. Structural and morphological parameters of the series of samples S<sub>105</sub> and S<sub>165</sub>, obtained from TEM images. RSD stands for relative standard deviation

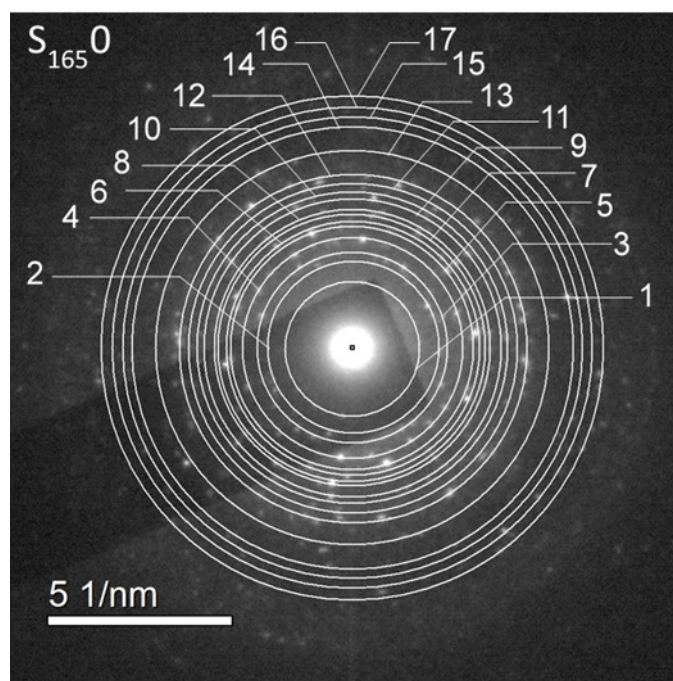

Figure S3. SAED pattern for sample S<sub>165</sub>0. Numbered rings are analyzed in Table S2 in the SI.

| Sample                    | Ring | Experimental $d_{hkl}$ (Å) | $d_{hkl}$ (Å) $\text{Bi}_2\text{S}_3^1$ | Plane of $\text{Bi}_2\text{S}_3^1$ |
|---------------------------|------|----------------------------|-----------------------------------------|------------------------------------|
| <b>S<sub>105</sub>120</b> | 1    | 5.55                       | 5.5660                                  | 200                                |
|                           | 2    | 3.93                       | 3.9630                                  | 220                                |
|                           | 3    | 3.81                       | 3.7480                                  | 101                                |
|                           | 4    | 3.33                       | 3.2530                                  | 021                                |
|                           | 5    | 3.01                       | 3.1100                                  | 211                                |
|                           | 6    | 2.89                       | 2.8240                                  | 040                                |
|                           | 7    | 2.75                       | 2.7170                                  | 301                                |
|                           | 8    | 2.66                       | 2.6410                                  | 311                                |
|                           | 9    | 2.45                       | 2.4560                                  | 231                                |
|                           | 10   | 2.38                       | 2.3050                                  | 041                                |
|                           | 11   | 2.18                       | 2.1880                                  | 510                                |
|                           | 12   | 2.12                       | 2.1180                                  | 421                                |
|                           | 13   | 2.07                       | 2.0750                                  | 520                                |
|                           | 14   | 1.661                      | 1.6650                                  | 611                                |
|                           | 15   | 1.59                       | 1.5870                                  | 550                                |
|                           | 16   | 1.538                      | 1.5328                                  | 720                                |
|                           | 17   | 1.46                       | 1.4809                                  | 271                                |

Table S2. Interplanar distances for sample S<sub>165</sub>0 computed from the SAED pattern in Fig. S3 in the SI, using the Bi<sub>2</sub>S<sub>3</sub> reference code: 00-017-0320.

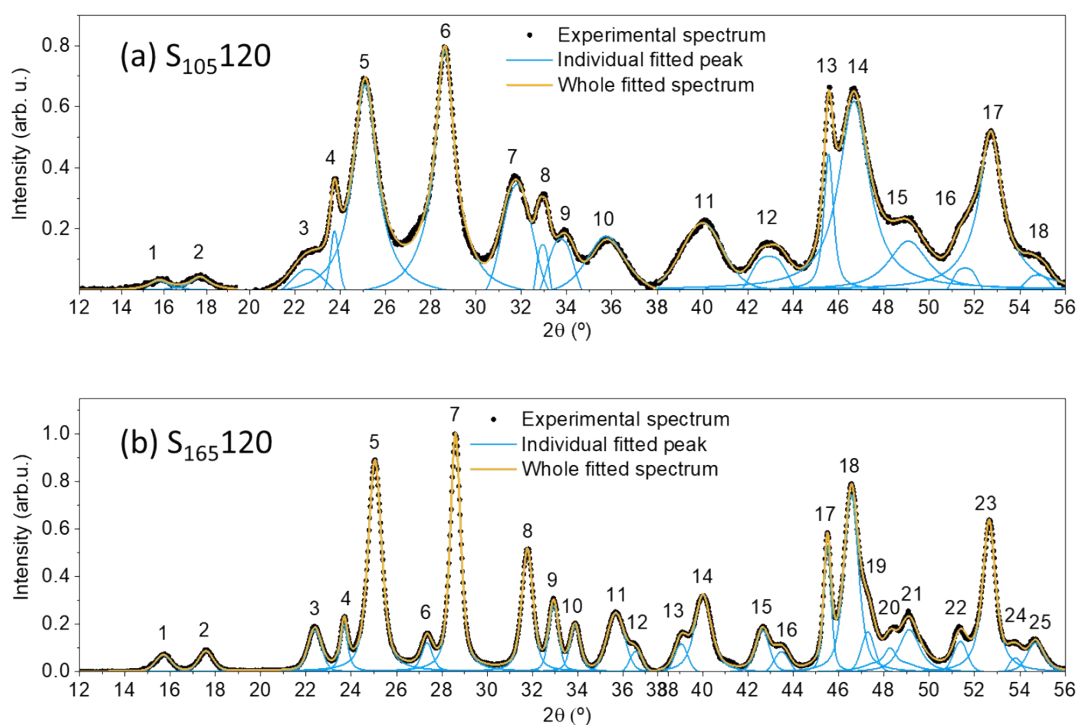

Figure S4. Multiple peak fitting of the XRD spectra from 12 to 56° for the samples S<sub>105</sub>120 (a) and S<sub>165</sub>120 (b). For each sample, the experimental spectrum (black spheres), whole fitted spectrum (yellow solid line), and individual fitted peaks (blue solid line) are depicted. Numbered peaks are analyzed in Table S3 in the SI.

| $S_{105}120$ |               |                |         | $S_{165}120$ |               |                |         |
|--------------|---------------|----------------|---------|--------------|---------------|----------------|---------|
| Peak         | $2\theta$ (°) | $D_{XRD}$ (nm) | Plane   | Peak         | $2\theta$ (°) | $D_{XRD}$ (nm) | Plane   |
| 1            | 15.76         | 7.2            | 200     | 1            | 15.70         | 10.5           | 020     |
| 2            | 17.70         | 7.3            | 120     | 2            | 17.59         | 11.2           | 120     |
| 3            | 22.57         | 5.0            | 220     | 3            | 22.39         | 12.2           | 220     |
| 4            | 23.75         | 18.9           | 101     | 4            | 23.69         | 22.9           | 101     |
| 5            | 25.10         | 6.5            | 310     | 5            | 25.05         | 12.1           | 130     |
| 6            | 28.62         | 8.0            | 211     | 6            | 27.35         | 14.9           | 021     |
| 7            | 31.82         | 5.7            | 221     | 7            | 28.60         | 16.0           | 211     |
| 8            | 32.94         | 15.0           | 301     | 8            | 31.78         | 14.7           | 221     |
| 9            | 33.74         | 7.1            | 311     | 9            | 32.93         | 17.1           | 301     |
| 10           | 35.75         | 4.1            | 240     | 10           | 33.88         | 16.4           | 311     |
| 11           | 40.01         | 4.2            | 430     | 11           | 35.69         | 9.7            | 240     |
| 12           | 42.94         | 5.7            | 250     | 12           | 36.57         | 14.2           | 231     |
| 13           | 45.56         | 18.0           | 002     | 13           | 39.05         | 13.1           | 041/141 |
| 14           | 46.68         | 5.6            | 501     | 14           | 40.01         | 10.2           | 430     |
| 15           | 49.08         | 4.5            | 160     | 15           | 42.65         | 12.5           | 421     |
| 16           | 51.58         | 8.7            | 222     | 16           | 43.48         | 11.8           | 250/520 |
| 17           | 52.72         | 7.3            | 312/061 | 17           | 45.51         | 23.4           | 002     |
| 18           | 54.78         | 8.6            | 161     | 18           | 46.56         | 11.9           | 431/501 |
|              |               |                |         | 19           | 47.30         | 13.1           | 530     |
|              |               |                |         | 20           | 48.27         | 10.1           | 060     |
|              |               |                |         | 21           | 49.12         | 8.4            | 160     |
|              |               |                |         | 22           | 51.37         | 12.6           | 222     |
|              |               |                |         | 23           | 52.64         | 13.6           | 351     |
|              |               |                |         | 24           | 53.80         | 15.0           | 061     |
|              |               |                |         | 25           | 54.69         | 10.7           | 360     |

Table S3. Plane indexation and  $D_{XRD}$  for samples  $S_{105}120$  (left) and  $S_{165}120$  (right) obtained from the multiple peak fitting of the XRD spectra in Fig. S4 in the SI.

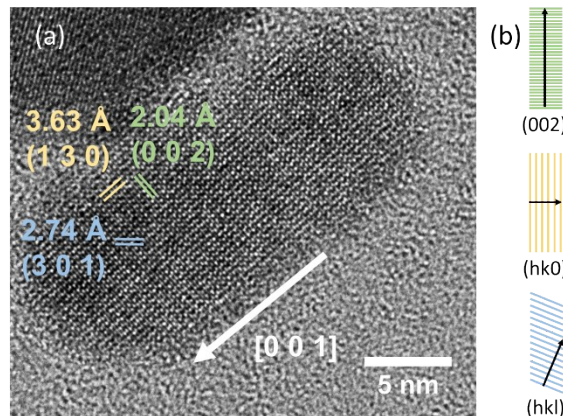

Figure S5. (a) Main interplanar distances together with their corresponding planes for a single  $\text{Bi}_2\text{S}_3$  NR of sample  $S_{165}120$ . (b) Schematic illustrations of perpendicular (002), parallel (hk0), and diagonal (hkl) planes. Crystal growth along the [001] direction is shown with a white arrow.
