# Supplementary material for: Selective anisotropic growth of Bi2S3 nanoparticles with adjustable optical properties
Source: Royal Society of Chemistry journal article supplement (doi:10.1039/d2cp05437j), 2022-12-20
Supplement: d2cp05437j2.xlsx [file d2cp05437j2.xlsx]

## Sheet: S1050
S1050
Wavelength (nm)	Absorbance (arb. u.)	hν (eV)	Absorption α (cm-1)	(α hν)2 (eV cm-1)2			Geometrical factor:		2.303	cm-1
1100	0.01595	1.12727	0.0367328	0.00171461
1099	0.0159	1.1283	0.0366177	0.00170699
1098	0.01597	1.12933	0.0367789	0.0017252
1097	0.01605	1.13036	0.0369631	0.00174571
1096	0.01607	1.13139	0.0370092	0.00175325
1095	0.01608	1.13242	0.0370322	0.00175863
1094	0.01611	1.13346	0.0371013	0.00176844
1093	0.01617	1.13449	0.0372395	0.00178488
1092	0.01621	1.13553	0.0373316	0.00179701
1091	0.01623	1.13657	0.0373777	0.00180475
1090	0.01628	1.13761	0.0374928	0.00181921
1089	0.01633	1.13866	0.037608	0.00183378
1088	0.01636	1.13971	0.0376771	0.00184392
1087	0.01639	1.14075	0.0377462	0.00185407
1086	0.01642	1.1418	0.0378153	0.00186429
1085	0.01647	1.14286	0.0379304	0.00187915
1084	0.01649	1.14391	0.0379765	0.00188718
1083	0.01655	1.14497	0.0381146	0.00190446
1082	0.01663	1.14603	0.0382989	0.00192648
1081	0.01667	1.14709	0.038391	0.00193934
1080	0.01668	1.14815	0.038414	0.00194526
1079	0.0167	1.14921	0.0384601	0.00195353
1078	0.01678	1.15028	0.0386443	0.00197596
1077	0.01684	1.15135	0.0387825	0.00199382
1076	0.01687	1.15242	0.0388516	0.00200465
1075	0.01692	1.15349	0.0389668	0.0020203
1074	0.01695	1.15456	0.0390358	0.00203124
1073	0.01697	1.15564	0.0390819	0.00203984
1072	0.01704	1.15672	0.0392431	0.00206055
1071	0.01708	1.1578	0.0393352	0.0020741
1070	0.01713	1.15888	0.0394504	0.00209016
1069	0.01718	1.15996	0.0395655	0.0021063
1068	0.0172	1.16105	0.0396116	0.00211518
1067	0.01725	1.16214	0.0397268	0.00213149
1066	0.0173	1.16323	0.0398419	0.00214789
1065	0.01736	1.16432	0.0399801	0.00216687
1064	0.01744	1.16541	0.0401643	0.00219098
1063	0.01749	1.16651	0.0402795	0.00220772
1062	0.01755	1.16761	0.0404176	0.00222709
1061	0.01757	1.16871	0.0404637	0.00223638
1060	0.0176	1.16981	0.0405328	0.00224825
1059	0.01765	1.17092	0.0406479	0.00226533
1058	0.01768	1.17202	0.040717	0.00227731
1057	0.01773	1.17313	0.0408322	0.00229455
1056	0.01776	1.17424	0.0409013	0.00230668
1055	0.01782	1.17536	0.0410395	0.00232673
1054	0.01787	1.17647	0.0411546	0.00234422
1053	0.01787	1.17759	0.0411546	0.00234869
1052	0.01792	1.17871	0.0412698	0.00236634
1051	0.01796	1.17983	0.0413619	0.00238144
1050	0.018	1.18095	0.041454	0.0023966
1049	0.01804	1.18208	0.0415461	0.00241187
1048	0.01809	1.18321	0.0416613	0.0024299
1047	0.01814	1.18434	0.0417764	0.00244802
1046	0.01819	1.18547	0.0418916	0.00246623
1045	0.01823	1.1866	0.0419837	0.00248182
1044	0.01828	1.18774	0.0420988	0.00250025
1043	0.01835	1.18888	0.0422601	0.00252427
1042	0.01837	1.19002	0.0423061	0.00253463
1041	0.01843	1.19116	0.0424443	0.00255611
1040	0.01845	1.19231	0.0424904	0.0025666
1039	0.01853	1.19346	0.0426746	0.00259391
1038	0.01857	1.19461	0.0427667	0.00261014
1037	0.01858	1.19576	0.0427897	0.00261799
1036	0.01864	1.19691	0.0429279	0.00263999
1035	0.01869	1.19807	0.0430431	0.00265932
1034	0.01872	1.19923	0.0431122	0.00267303
1033	0.01878	1.20039	0.0432503	0.0026954
1032	0.01884	1.20155	0.0433885	0.0027179
1031	0.01887	1.20272	0.0434576	0.00273187
1030	0.01891	1.20388	0.0435497	0.00274876
1029	0.01895	1.20505	0.0436419	0.00276577
1028	0.01902	1.20623	0.0438031	0.0027917
1027	0.0191	1.2074	0.0439873	0.0028207
1026	0.01912	1.20858	0.0440334	0.00283214
1025	0.01917	1.20976	0.0441485	0.00285253
1024	0.01923	1.21094	0.0442867	0.00287602
1023	0.01926	1.21212	0.0443558	0.00289062
1022	0.01932	1.21331	0.044494	0.00291438
1021	0.01936	1.2145	0.0445861	0.0029322
1020	0.01939	1.21569	0.0446552	0.00294706
1019	0.01946	1.21688	0.0448164	0.00297419
1018	0.01951	1.21807	0.0449315	0.00299535
1017	0.01956	1.21927	0.0450467	0.00301665
1016	0.01962	1.22047	0.0451849	0.00304117
1015	0.01968	1.22167	0.045323	0.00306581
1014	0.01971	1.22288	0.0453921	0.00308126
1013	0.01977	1.22409	0.0455303	0.00310619
1012	0.01983	1.2253	0.0456685	0.00313125
1011	0.01988	1.22651	0.0457836	0.00315328
1010	0.01995	1.22772	0.0459448	0.0031818
1009	0.02002	1.22894	0.0461061	0.00321053
1008	0.02008	1.23016	0.0462442	0.00323622
1007	0.02014	1.23138	0.0463824	0.00326205
1006	0.02019	1.2326	0.0464976	0.00328477
1005	0.02024	1.23383	0.0466127	0.00330765
1004	0.02029	1.23506	0.0467279	0.00333064
1003	0.02036	1.23629	0.0468891	0.00336035
1002	0.02042	1.23752	0.0470273	0.00338691
1001	0.02046	1.23876	0.0471194	0.00340701
1000	0.02051	1.24	0.0472345	0.00343054
999	0.02057	1.24124	0.0473727	0.00345755
998	0.02063	1.24248	0.0475109	0.0034847
997	0.02068	1.24373	0.047626	0.00350866
996	0.02074	1.24498	0.0477642	0.00353615
995	0.02081	1.24623	0.0479254	0.00356721
994	0.02086	1.24748	0.0480406	0.00359156
993	0.02091	1.24874	0.0481557	0.0036161
992	0.02097	1.25	0.0482939	0.00364422
991	0.02104	1.25126	0.0484551	0.00367599
990	0.02111	1.25253	0.0486163	0.00370801
989	0.02118	1.25379	0.0487775	0.00374015
988	0.02123	1.25506	0.0488927	0.00376545
987	0.02128	1.25633	0.0490078	0.00379087
986	0.02135	1.25761	0.049169	0.00382363
985	0.02143	1.25888	0.0493533	0.00386012
984	0.0215	1.26016	0.0495145	0.00389328
983	0.02157	1.26144	0.0496757	0.00392664
982	0.02164	1.26273	0.0498369	0.00396026
981	0.02168	1.26402	0.049929	0.00398304
980	0.02173	1.26531	0.0500442	0.0040096
979	0.02181	1.2666	0.0502284	0.00404742
978	0.02186	1.26789	0.0503436	0.00407428
977	0.0219	1.26919	0.0504357	0.0040976
976	0.02195	1.27049	0.0505509	0.00412477
975	0.02202	1.27179	0.0507121	0.00415962
974	0.02211	1.2731	0.0509193	0.00420233
973	0.02218	1.27441	0.0510805	0.00423769
972	0.02226	1.27572	0.0512648	0.0042771
971	0.02232	1.27703	0.051403	0.00430902
970	0.02238	1.27835	0.0515411	0.00434118
969	0.02246	1.27967	0.0517254	0.0043813
968	0.02252	1.28099	0.0518636	0.00441384
967	0.0226	1.28232	0.0520478	0.00445449
966	0.02267	1.28364	0.052209	0.00449136
965	0.02273	1.28497	0.0523472	0.00452452
964	0.02281	1.28631	0.0525314	0.00456594
963	0.02288	1.28764	0.0526926	0.00460351
962	0.02295	1.28898	0.0528539	0.00464136
961	0.02303	1.29032	0.0530381	0.0046835
960	0.02313	1.29167	0.0532684	0.00473415
959	0.02321	1.29301	0.0534526	0.00477685
958	0.0233	1.29436	0.0536599	0.00482403
957	0.02339	1.29572	0.0538672	0.00487159
956	0.02345	1.29707	0.0540053	0.00490682
955	0.02361	1.29843	0.0543738	0.00498445
954	0.0237	1.29979	0.0545811	0.00503305
953	0.02379	1.30115	0.0547884	0.00508196
952	0.02387	1.30252	0.0549726	0.00512698
951	0.02395	1.30389	0.0551568	0.00517227
950	0.02404	1.30526	0.0553641	0.00522217
949	0.02411	1.30664	0.0555253	0.00526374
948	0.02419	1.30802	0.0557096	0.00530992
947	0.0243	1.3094	0.0559629	0.00536964
946	0.02438	1.31078	0.0561471	0.00541645
945	0.02447	1.31217	0.0563544	0.00546809
944	0.02455	1.31356	0.0565386	0.00551557
943	0.02465	1.31495	0.0567689	0.00557237
942	0.02476	1.31635	0.0570223	0.0056342
941	0.02485	1.31775	0.0572295	0.00568731
940	0.02496	1.31915	0.0574829	0.00574997
939	0.02506	1.32055	0.0577132	0.00580844
938	0.02516	1.32196	0.0579435	0.0058674
937	0.02525	1.32337	0.0581508	0.00592207
936	0.02536	1.32479	0.0584041	0.0059866
935	0.02546	1.3262	0.0586344	0.00604676
934	0.02557	1.32762	0.0588877	0.00611219
933	0.02567	1.32905	0.059118	0.00617337
932	0.02577	1.33047	0.0593483	0.00623486
931	0.02587	1.3319	0.0595786	0.00629686
930	0.02598	1.33333	0.0598319	0.00636417
929	0.02608	1.33477	0.0600622	0.00642711
928	0.02617	1.33621	0.0602695	0.00648552
927	0.02628	1.33765	0.0605228	0.00655426
926	0.02638	1.33909	0.0607531	0.00661846
925	0.02649	1.34054	0.0610065	0.00668823
924	0.0266	1.34199	0.0612598	0.00675849
923	0.02672	1.34345	0.0615362	0.00683445
922	0.02681	1.3449	0.0617434	0.00689543
921	0.02693	1.34636	0.0620198	0.00697241
920	0.02705	1.34783	0.0622962	0.00705006
919	0.02716	1.34929	0.0625495	0.00712292
918	0.02729	1.35076	0.0628489	0.00720695
917	0.0274	1.35224	0.0631022	0.00728109
916	0.0275	1.35371	0.0633325	0.00735029
915	0.02761	1.35519	0.0635858	0.00742542
914	0.02774	1.35667	0.0638852	0.00751189
913	0.02787	1.35816	0.0641846	0.00759913
912	0.02797	1.35965	0.0644149	0.00767056
911	0.02809	1.36114	0.0646913	0.00775348
910	0.02821	1.36264	0.0649676	0.00783712
909	0.02834	1.36414	0.065267	0.00792694
908	0.02845	1.36564	0.0655203	0.00800617
907	0.02858	1.36714	0.0658197	0.00809726
906	0.0287	1.36865	0.0660961	0.00818345
905	0.02883	1.37017	0.0663955	0.00827611
904	0.02895	1.37168	0.0666719	0.00836355
903	0.0291	1.3732	0.0670173	0.00846918
902	0.02923	1.37472	0.0673167	0.00856395
901	0.02936	1.37625	0.0676161	0.00865954
900	0.02948	1.37778	0.0678924	0.00874989
899	0.02971	1.37931	0.0684221	0.0089067
898	0.02988	1.38085	0.0688136	0.00902905
897	0.02998	1.38239	0.0690439	0.00910987
896	0.03014	1.38393	0.0694124	0.00922789
895	0.03028	1.38547	0.0697348	0.00933456
894	0.03039	1.38702	0.0699882	0.00942355
893	0.03055	1.38858	0.0703567	0.00954448
892	0.0307	1.39013	0.0707021	0.00965996
891	0.03081	1.39169	0.0709554	0.00975116
890	0.03096	1.39326	0.0713009	0.00986857
889	0.03107	1.39483	0.0715542	0.00996123
888	0.03124	1.3964	0.0719457	0.0100932
887	0.03136	1.39797	0.0722221	0.0101938
886	0.03153	1.39955	0.0726136	0.0103279
885	0.03166	1.40113	0.072913	0.0104368
884	0.03183	1.40271	0.0733045	0.010573
883	0.03199	1.4043	0.073673	0.0107038
882	0.03215	1.4059	0.0740414	0.0108357
881	0.03233	1.40749	0.074456	0.0109822
880	0.03247	1.40909	0.0747784	0.0111027
879	0.03265	1.41069	0.0751929	0.0112517
878	0.03279	1.4123	0.0755154	0.0113743
877	0.03293	1.41391	0.0758378	0.0114978
876	0.03311	1.41553	0.0762523	0.0116505
875	0.03324	1.41714	0.0765517	0.0117689
874	0.0334	1.41876	0.0769202	0.0119096
873	0.03356	1.42039	0.0772887	0.0120517
872	0.03371	1.42202	0.0776341	0.0121876
871	0.03388	1.42365	0.0780256	0.012339
870	0.03408	1.42529	0.0784862	0.0125139
869	0.03428	1.42693	0.0789468	0.0126904
868	0.03443	1.42857	0.0792923	0.0128311
867	0.03458	1.43022	0.0796377	0.0129731
866	0.03476	1.43187	0.0800523	0.0131388
865	0.03504	1.43353	0.0806971	0.0133823
864	0.0353	1.43519	0.0812959	0.0136131
863	0.03547	1.43685	0.0816874	0.0137763
862	0.03564	1.43852	0.0820789	0.013941
861	0.03582	1.44019	0.0824935	0.0141149
860	0.03603	1.44186	0.0829771	0.0143141
859	0.03621	1.44354	0.0833916	0.0144911
858	0.03641	1.44522	0.0838522	0.0146858
857	0.03658	1.44691	0.0842437	0.0148579
856	0.03674	1.4486	0.0846122	0.0150232
855	0.03693	1.45029	0.0850498	0.0152144
854	0.03713	1.45199	0.0855104	0.0154158
853	0.03732	1.45369	0.085948	0.0156104
852	0.03751	1.4554	0.0863855	0.0158069
851	0.03773	1.45711	0.0868922	0.0160305
850	0.03794	1.45882	0.0873758	0.0162475
849	0.03811	1.46054	0.0877673	0.0164321
848	0.03833	1.46226	0.088274	0.0166615
847	0.03853	1.46399	0.0887346	0.0168757
846	0.03871	1.46572	0.0891491	0.017074
845	0.03889	1.46746	0.0895637	0.0172741
844	0.03911	1.46919	0.0900703	0.0175113
843	0.03931	1.47094	0.0905309	0.0177331
842	0.03955	1.47268	0.0910837	0.0179928
841	0.03976	1.47444	0.0915673	0.0182278
840	0.04	1.47619	0.09212	0.0184924
839	0.0402	1.47795	0.0925806	0.0187223
838	0.04046	1.47971	0.0931794	0.0190105
837	0.0407	1.48148	0.0937321	0.0192827
836	0.04097	1.48325	0.0943539	0.0195861
835	0.04119	1.48503	0.0948606	0.0198446
834	0.04147	1.48681	0.0955054	0.0201635
833	0.04179	1.4886	0.0962424	0.0205253
832	0.04204	1.49038	0.0968181	0.0208213
831	0.04232	1.49218	0.097463	0.0211505
830	0.0426	1.49398	0.0981078	0.0214831
829	0.04282	1.49578	0.0986145	0.0217579
828	0.04307	1.49758	0.0991902	0.0220657
827	0.04328	1.4994	0.0996738	0.0223356
826	0.04348	1.50121	0.100134	0.022597
825	0.04367	1.50303	0.100572	0.0228502
824	0.04387	1.50485	0.101033	0.0231158
823	0.0441	1.50668	0.101562	0.0234157
822	0.04431	1.50852	0.102046	0.023697
821	0.04452	1.51035	0.10253	0.0239802
820	0.04478	1.5122	0.103128	0.0243206
819	0.04506	1.51404	0.103773	0.0246857
818	0.04528	1.51589	0.10428	0.0249883
817	0.04555	1.51775	0.104902	0.0253493
816	0.04581	1.51961	0.1055	0.0257023
815	0.04608	1.52147	0.106122	0.0260699
814	0.04634	1.52334	0.106721	0.0264298
813	0.04662	1.52522	0.107366	0.0268162
812	0.04685	1.52709	0.107896	0.0271479
811	0.04712	1.52898	0.108517	0.0275297
810	0.04759	1.53086	0.1096	0.0281508
809	0.04795	1.53276	0.110429	0.0286493
808	0.04822	1.53465	0.111051	0.0290443
807	0.04848	1.53656	0.111649	0.0294315
806	0.04877	1.53846	0.112317	0.0298584
805	0.04907	1.54037	0.113008	0.0303019
804	0.04933	1.54229	0.113607	0.0307003
803	0.04962	1.54421	0.114275	0.0311397
802	0.04991	1.54613	0.114943	0.0315831
801	0.05019	1.54806	0.115588	0.0320183
800	0.05047	1.55	0.116232	0.0324577
799	0.05076	1.55194	0.1169	0.032914
798	0.05108	1.55388	0.117637	0.0334137
797	0.05138	1.55583	0.118328	0.0338922
796	0.05168	1.55779	0.119019	0.0343756
795	0.05201	1.55975	0.119779	0.0349037
794	0.05232	1.56171	0.120493	0.0354099
793	0.05259	1.56368	0.121115	0.0358666
792	0.05291	1.56566	0.121852	0.0363964
791	0.05324	1.56764	0.122612	0.0369451
790	0.05353	1.56962	0.12328	0.0374431
789	0.05385	1.57161	0.124017	0.0379882
788	0.05415	1.5736	0.124707	0.03851
787	0.05448	1.5756	0.125467	0.03908
786	0.05481	1.57761	0.126227	0.0396558
785	0.05511	1.57962	0.126918	0.0401933
784	0.05543	1.58163	0.127655	0.040765
783	0.05577	1.58365	0.128438	0.0413721
782	0.05608	1.58568	0.129152	0.0419406
781	0.05645	1.58771	0.130004	0.0426048
780	0.05676	1.58974	0.130718	0.0431842
779	0.05711	1.59178	0.131524	0.0438307
778	0.05742	1.59383	0.132238	0.044422
777	0.05774	1.59588	0.132975	0.0450341
776	0.0581	1.59794	0.133804	0.0457152
775	0.05844	1.6	0.134587	0.0463712
774	0.0588	1.60207	0.135416	0.0470658
773	0.05913	1.60414	0.136176	0.0477187
772	0.0595	1.60622	0.137028	0.0484431
771	0.05989	1.6083	0.137927	0.0492074
770	0.06021	1.61039	0.138664	0.049864
769	0.0606	1.61248	0.139562	0.0506433
768	0.06097	1.61458	0.140414	0.0513972
767	0.0613	1.61669	0.141174	0.052091
766	0.06163	1.6188	0.141934	0.0527908
765	0.06198	1.62092	0.14274	0.0535321
764	0.06236	1.62304	0.143615	0.0543324
763	0.06274	1.62516	0.14449	0.0551403
762	0.06312	1.6273	0.145365	0.0559573
761	0.06348	1.62943	0.146194	0.0567457
760	0.06387	1.63158	0.147093	0.0575968
759	0.06425	1.63373	0.147968	0.0584379
758	0.06462	1.63588	0.14882	0.0592686
757	0.06502	1.63804	0.149741	0.0601632
756	0.06537	1.64021	0.150547	0.0609739
755	0.06604	1.64238	0.15209	0.0623949
754	0.0665	1.64456	0.153149	0.0634352
753	0.06691	1.64675	0.154094	0.064391
752	0.06729	1.64894	0.154969	0.0652978
751	0.06767	1.65113	0.155844	0.0662129
750	0.06805	1.65333	0.156719	0.0671372
749	0.0685	1.65554	0.157756	0.0682101
748	0.06886	1.65775	0.158585	0.069113
747	0.06924	1.65997	0.15946	0.0700652
746	0.06967	1.6622	0.16045	0.0711289
745	0.07008	1.66443	0.161394	0.0721618
744	0.07048	1.66667	0.162315	0.0731845
743	0.0709	1.66891	0.163283	0.0742585
742	0.07129	1.67116	0.164181	0.0752803
741	0.0717	1.67341	0.165125	0.0763538
740	0.07212	1.67568	0.166092	0.0774607
739	0.07257	1.67794	0.167129	0.0786421
738	0.073	1.68022	0.168119	0.0797932
737	0.07342	1.6825	0.169086	0.0809332
736	0.07383	1.68478	0.17003	0.0820616
735	0.07425	1.68707	0.170998	0.0832237
734	0.07467	1.68937	0.171965	0.0843975
733	0.07511	1.69168	0.172978	0.0856288
732	0.07553	1.69399	0.173946	0.0868257
731	0.07596	1.69631	0.174936	0.0880579
730	0.07641	1.69863	0.175972	0.0893482
729	0.07682	1.70096	0.176916	0.0905576
728	0.07726	1.7033	0.17793	0.0918501
727	0.07769	1.70564	0.17892	0.0931307
726	0.07814	1.70799	0.179956	0.0944725
725	0.07857	1.71034	0.180947	0.0957781
724	0.07904	1.71271	0.182029	0.0971962
723	0.07947	1.71508	0.183019	0.0985288
722	0.0799	1.71745	0.18401	0.0998734
721	0.08035	1.71983	0.185046	0.101282
720	0.08079	1.72222	0.186059	0.102679
719	0.08125	1.72462	0.187119	0.104141
718	0.08169	1.72702	0.188132	0.105565
717	0.08215	1.72943	0.189191	0.107056
716	0.08262	1.73184	0.190274	0.108586
715	0.08307	1.73427	0.19131	0.11008
714	0.08353	1.73669	0.19237	0.111614
713	0.08396	1.73913	0.19336	0.113083
712	0.08448	1.74157	0.194557	0.114809
711	0.08492	1.74402	0.195571	0.116335
710	0.08542	1.74648	0.196722	0.118041
709	0.08588	1.74894	0.197782	0.119652
708	0.08634	1.75141	0.198841	0.12128
707	0.08685	1.75389	0.200016	0.123064
706	0.08732	1.75637	0.201098	0.124752
705	0.08775	1.75887	0.202088	0.126343
704	0.08821	1.76136	0.203148	0.128032
703	0.08873	1.76387	0.204345	0.129916
702	0.08917	1.76638	0.205359	0.131581
701	0.08968	1.7689	0.206533	0.133471
700	0.09008	1.77143	0.207454	0.135049
699	0.09072	1.77396	0.208928	0.137367
698	0.0912	1.7765	0.210034	0.139222
697	0.09168	1.77905	0.211139	0.141096
696	0.09215	1.78161	0.212221	0.142956
695	0.09266	1.78417	0.213396	0.144959
694	0.09313	1.78674	0.214478	0.146855
693	0.09361	1.78932	0.215584	0.148802
692	0.09411	1.79191	0.216735	0.150831
691	0.09461	1.7945	0.217887	0.152879
690	0.09541	1.7971	0.219729	0.155927
689	0.09611	1.79971	0.221341	0.158683
688	0.09663	1.80233	0.222539	0.160872
687	0.09714	1.80495	0.223713	0.163048
686	0.09764	1.80758	0.224865	0.165211
685	0.09816	1.81022	0.226062	0.167463
684	0.09867	1.81287	0.227237	0.169704
683	0.09917	1.81552	0.228389	0.17193
682	0.09968	1.81818	0.229563	0.174212
681	0.10018	1.82085	0.230715	0.176481
680	0.10069	1.82353	0.231889	0.178808
679	0.10121	1.82622	0.233087	0.181193
678	0.10172	1.82891	0.234261	0.183563
677	0.10224	1.83161	0.235459	0.185993
676	0.10274	1.83432	0.23661	0.188372
675	0.10324	1.83704	0.237762	0.190775
674	0.10374	1.83976	0.238913	0.193198
673	0.10426	1.8425	0.240111	0.195721
672	0.10479	1.84524	0.241331	0.198305
671	0.10529	1.84799	0.242483	0.200799
670	0.1058	1.85075	0.243657	0.203355
669	0.10632	1.85351	0.244855	0.205972
668	0.10685	1.85629	0.246076	0.208655
667	0.10737	1.85907	0.247273	0.211322
666	0.10791	1.86186	0.248517	0.214094
665	0.10842	1.86466	0.249691	0.216773
664	0.10896	1.86747	0.250935	0.219598
663	0.10951	1.87029	0.252202	0.222491
662	0.11005	1.87311	0.253445	0.225369
661	0.11057	1.87595	0.254643	0.228194
660	0.11111	1.87879	0.255886	0.231127
659	0.11166	1.88164	0.257153	0.23413
658	0.1122	1.8845	0.258397	0.237119
657	0.11275	1.88737	0.259663	0.240179
656	0.1133	1.89024	0.26093	0.243266
655	0.11387	1.89313	0.262243	0.246472
654	0.1144	1.89602	0.263463	0.249532
653	0.11497	1.89893	0.264776	0.252799
652	0.11552	1.90184	0.266043	0.256006
651	0.11606	1.90476	0.267286	0.259199
650	0.11658	1.90769	0.268484	0.262332
649	0.11714	1.91063	0.269773	0.265675
648	0.11764	1.91358	0.270925	0.268776
647	0.1182	1.91654	0.272215	0.272182
646	0.11875	1.9195	0.273481	0.27557
645	0.11931	1.92248	0.274771	0.279039
644	0.11986	1.92547	0.276038	0.282494
643	0.12042	1.92846	0.277327	0.286027
642	0.12096	1.93146	0.278571	0.289496
641	0.12154	1.93448	0.279907	0.293194
640	0.12208	1.9375	0.28115	0.296729
639	0.12263	1.94053	0.282417	0.300346
638	0.12319	1.94357	0.283707	0.304046
637	0.12374	1.94662	0.284973	0.30773
636	0.12431	1.94969	0.286286	0.311552
635	0.12487	1.95276	0.287576	0.315357
634	0.12593	1.95584	0.290017	0.321746
633	0.1266	1.95893	0.29156	0.326207
632	0.12717	1.96203	0.292873	0.330193
631	0.12774	1.96513	0.294185	0.334214
630	0.1283	1.96825	0.295475	0.338222
629	0.12886	1.97138	0.296765	0.342267
628	0.12942	1.97452	0.298054	0.346349
627	0.13	1.97767	0.29939	0.350576
626	0.13059	1.98083	0.300749	0.354897
625	0.13116	1.984	0.302061	0.359148
624	0.13173	1.98718	0.303374	0.363439
623	0.1323	1.99037	0.304687	0.367769
622	0.1329	1.99357	0.306069	0.372307
621	0.13347	1.99678	0.307381	0.376717
620	0.13404	2	0.308694	0.381168
619	0.13462	2.00323	0.31003	0.385717
618	0.1352	2.00647	0.311366	0.390307
617	0.13579	2.00972	0.312724	0.394998
616	0.13636	2.01299	0.314037	0.399618
615	0.13694	2.01626	0.315373	0.404335
614	0.13754	2.01954	0.316755	0.409214
613	0.13814	2.02284	0.318136	0.414143
612	0.13871	2.02614	0.319449	0.418931
611	0.1393	2.02946	0.320808	0.423888
610	0.1399	2.03279	0.32219	0.428952
609	0.14047	2.03612	0.323502	0.433872
608	0.14106	2.03947	0.324861	0.438965
607	0.14166	2.04283	0.326243	0.444168
606	0.14225	2.0462	0.327602	0.449354
605	0.14284	2.04959	0.328961	0.454592
604	0.14344	2.05298	0.330342	0.459936
603	0.14404	2.05638	0.331724	0.46533
602	0.14465	2.0598	0.333129	0.470842
601	0.14525	2.06323	0.334511	0.476338
600	0.14588	2.06667	0.335962	0.482083
599	0.1465	2.07012	0.337389	0.487814
598	0.1471	2.07358	0.338771	0.493463
597	0.14771	2.07705	0.340176	0.499231
596	0.14832	2.08054	0.341581	0.505056
595	0.14891	2.08403	0.34294	0.510791
594	0.14952	2.08754	0.344345	0.516721
593	0.15012	2.09106	0.345726	0.522634
592	0.15071	2.09459	0.347085	0.528531
591	0.15131	2.09814	0.348467	0.534555
590	0.15191	2.10169	0.349849	0.540627
589	0.15253	2.10526	0.351277	0.546902
588	0.15314	2.10884	0.352681	0.553162
587	0.15376	2.11244	0.354109	0.559556
586	0.15436	2.11604	0.355491	0.565855
585	0.15497	2.11966	0.356896	0.572289
584	0.15562	2.12329	0.358393	0.579078
583	0.15625	2.12693	0.359844	0.58578
582	0.15687	2.13058	0.361272	0.592466
581	0.15749	2.13425	0.362699	0.599217
580	0.15826	2.13793	0.364473	0.60718
579	0.15944	2.14162	0.36719	0.618397
578	0.16008	2.14533	0.368664	0.625533
577	0.16071	2.14905	0.370115	0.632655
576	0.16137	2.15278	0.371635	0.640078
575	0.162	2.15652	0.373086	0.647329
574	0.16264	2.16028	0.37456	0.654731
573	0.16329	2.16405	0.376057	0.66228
572	0.16394	2.16783	0.377554	0.669897
571	0.16456	2.17163	0.378982	0.677342
570	0.16524	2.17544	0.380548	0.68535
569	0.16587	2.17926	0.381999	0.693013
568	0.16654	2.1831	0.383542	0.701088
567	0.16716	2.18695	0.384969	0.708811
566	0.16785	2.19081	0.386559	0.7172
565	0.16848	2.19469	0.388009	0.725155
564	0.16917	2.19858	0.389599	0.733701
563	0.16983	2.20249	0.391118	0.74207
562	0.17046	2.20641	0.392569	0.750249
561	0.17112	2.21034	0.394089	0.758766
560	0.17176	2.21429	0.395563	0.767186
559	0.17242	2.21825	0.397083	0.775861
558	0.17306	2.22222	0.398557	0.784432
557	0.17376	2.22621	0.400169	0.793633
556	0.17442	2.23022	0.401689	0.802557
555	0.17509	2.23423	0.403232	0.811645
554	0.1758	2.23827	0.404867	0.821203
553	0.17644	2.24231	0.406341	0.830182
552	0.17712	2.24638	0.407907	0.839633
551	0.17781	2.25045	0.409496	0.849257
550	0.17847	2.25455	0.411016	0.858693
549	0.17918	2.25865	0.412652	0.86869
548	0.17987	2.26277	0.414241	0.87859
547	0.18054	2.26691	0.415784	0.888389
546	0.18124	2.27106	0.417396	0.898573
545	0.18196	2.27523	0.419054	0.909055
544	0.18266	2.27941	0.420666	0.919432
543	0.18336	2.28361	0.422278	0.92991
542	0.18409	2.28782	0.423959	0.940788
541	0.18478	2.29205	0.425548	0.951362
540	0.18547	2.2963	0.427137	0.962039
539	0.18619	2.30056	0.428796	0.973123
538	0.18689	2.30483	0.430408	0.984097
537	0.18761	2.30912	0.432066	0.995389
536	0.18832	2.31343	0.433701	1.00668
535	0.18904	2.31776	0.435359	1.0182
534	0.18976	2.3221	0.437017	1.02981
533	0.19049	2.32645	0.438698	1.04164
532	0.19119	2.33083	0.440311	1.05327
531	0.19191	2.33522	0.441969	1.06522
530	0.19265	2.33962	0.443673	1.0775
529	0.1934	2.34405	0.4454	1.09002
528	0.19415	2.34848	0.447127	1.10265
527	0.19489	2.35294	0.448832	1.11529
526	0.19564	2.35741	0.450559	1.12817
525	0.19681	2.3619	0.453253	1.14605
524	0.19792	2.36641	0.45581	1.16345
523	0.19866	2.37094	0.457514	1.17666
522	0.1994	2.37548	0.459218	1.18998
521	0.20017	2.38004	0.460992	1.2038
520	0.20092	2.38462	0.462719	1.21751
519	0.20168	2.38921	0.464469	1.23147
518	0.20243	2.39382	0.466196	1.24543
517	0.20316	2.39845	0.467877	1.25929
516	0.20391	2.4031	0.469605	1.27353
515	0.20465	2.40777	0.471309	1.28778
514	0.20541	2.41245	0.473059	1.30241
513	0.20615	2.41715	0.474763	1.31693
512	0.20692	2.42188	0.476537	1.33198
511	0.20767	2.42661	0.478264	1.3469
510	0.20847	2.43137	0.480106	1.36263
509	0.20929	2.43615	0.481995	1.37877
508	0.21006	2.44094	0.483768	1.3944
507	0.21085	2.44576	0.485588	1.41047
506	0.21164	2.45059	0.487407	1.42667
505	0.21239	2.45545	0.489134	1.44251
504	0.21318	2.46032	0.490954	1.45903
503	0.21394	2.46521	0.492704	1.4753
502	0.2147	2.47012	0.494454	1.49172
501	0.21543	2.47505	0.496135	1.50788
500	0.21621	2.48	0.497932	1.52491
499	0.21699	2.48497	0.499728	1.54209
498	0.21778	2.48996	0.501547	1.55958
497	0.21856	2.49497	0.503344	1.5771
496	0.21929	2.5	0.505025	1.59406
495	0.22009	2.50505	0.506867	1.61221
494	0.22087	2.51012	0.508664	1.63024
493	0.22174	2.51521	0.510667	1.64977
492	0.22254	2.52033	0.51251	1.66847
491	0.2233	2.52546	0.51426	1.68673
490	0.2241	2.53061	0.516102	1.70578
489	0.2249	2.53579	0.517945	1.72502
488	0.22564	2.54098	0.519649	1.7435
487	0.22647	2.5462	0.52156	1.76358
486	0.22725	2.55144	0.523357	1.78306
485	0.22803	2.5567	0.525153	1.80273
484	0.22887	2.56198	0.527088	1.82355
483	0.22965	2.56729	0.528884	1.84362
482	0.23049	2.57261	0.530818	1.86483
481	0.23122	2.57796	0.5325	1.88448
480	0.23207	2.58333	0.534457	1.90628
479	0.23279	2.58873	0.536115	1.92615
478	0.23357	2.59414	0.537912	1.94719
477	0.23439	2.59958	0.5398	1.96912
476	0.23512	2.60504	0.541481	1.98974
475	0.23595	2.61053	0.543393	2.01227
474	0.2367	2.61603	0.54512	2.03362
473	0.23744	2.62156	0.546824	2.05502
472	0.23822	2.62712	0.548621	2.07732
471	0.23906	2.6327	0.550555	2.1009
470	0.23983	2.6383	0.552328	2.12346
469	0.24122	2.64392	0.55553	2.1573
468	0.242	2.64957	0.557326	2.18057
467	0.24284	2.65525	0.559261	2.20516
466	0.2436	2.66094	0.561011	2.2285
465	0.24434	2.66667	0.562715	2.25173
464	0.24514	2.67241	0.564557	2.27626
463	0.24595	2.67819	0.566423	2.30125
462	0.2467	2.68398	0.56815	2.32533
461	0.24744	2.6898	0.569854	2.34946
460	0.24819	2.69565	0.571582	2.37401
459	0.24891	2.70153	0.57324	2.39824
458	0.24965	2.70742	0.574944	2.42305
457	0.25043	2.71335	0.57674	2.44891
456	0.25119	2.7193	0.578491	2.47461
455	0.25228	2.72527	0.581001	2.50711
454	0.2534	2.73128	0.58358	2.54058
453	0.25415	2.73731	0.585307	2.56694
452	0.2549	2.74336	0.587035	2.59354
451	0.25559	2.74945	0.588624	2.61919
450	0.25629	2.75556	0.590236	2.64528
449	0.25704	2.76169	0.591963	2.67263
448	0.2577	2.76786	0.593483	2.69839
447	0.25834	2.77405	0.594957	2.72395
446	0.25899	2.78027	0.596454	2.74997
445	0.25967	2.78652	0.59802	2.77687
444	0.26037	2.79279	0.599632	2.80444
443	0.26102	2.7991	0.601129	2.83121
442	0.2617	2.80543	0.602695	2.85887
441	0.26239	2.81179	0.604284	2.88701
440	0.26306	2.81818	0.605827	2.91498
439	0.26372	2.8246	0.607347	2.94298
438	0.2644	2.83105	0.608913	2.97171
437	0.26512	2.83753	0.610571	3.00161
436	0.26576	2.84404	0.612045	3.02997
435	0.26633	2.85057	0.613358	3.05697
434	0.26695	2.85714	0.614786	3.08539
433	0.26756	2.86374	0.616191	3.11385
432	0.26816	2.87037	0.617572	3.14233
431	0.2688	2.87703	0.619046	3.17201
430	0.26937	2.88372	0.620359	3.20031
429	0.26999	2.89044	0.621787	3.23006
428	0.27068	2.8972	0.623376	3.2618
427	0.2712	2.90398	0.624574	3.28969
426	0.27175	2.9108	0.62584	3.31858
425	0.27236	2.91765	0.627245	3.3492
424	0.27292	2.92453	0.628535	3.37886
423	0.27343	2.93144	0.629709	3.40755
422	0.27407	2.93839	0.631183	3.43977
421	0.27454	2.94537	0.632266	3.468
420	0.27519	2.95238	0.633763	3.50104
419	0.27573	2.95943	0.635006	3.5316
418	0.27623	2.96651	0.636158	3.5614
417	0.27679	2.97362	0.637447	3.59302
416	0.27735	2.98077	0.638737	3.62494
415	0.27787	2.98795	0.639935	3.6561
414	0.27835	2.99517	0.64104	3.68649
413	0.27888	3.00242	0.642261	3.71848
412	0.27942	3.00971	0.643504	3.75104
411	0.27993	3.01703	0.644679	3.78308
410	0.28043	3.02439	0.64583	3.81516
409	0.28097	3.03178	0.647074	3.8486
408	0.28136	3.03922	0.647972	3.87826
407	0.28197	3.04668	0.649377	3.91424
406	0.28245	3.05419	0.650482	3.94696
405	0.28298	3.06173	0.651703	3.98138
404	0.28334	3.06931	0.652532	4.0113
403	0.28389	3.07692	0.653799	4.04688
402	0.28437	3.08458	0.654904	4.08082
401	0.28482	3.09227	0.65594	4.11418
400	0.28519	3.1	0.656793	4.14553
399	0.28598	3.10777	0.658612	4.18945
398	0.28641	3.11558	0.659602	4.2232
397	0.28681	3.12343	0.660523	4.25638
396	0.28735	3.13131	0.661767	4.294
395	0.28778	3.13924	0.662757	4.32871
394	0.2882	3.14721	0.663725	4.36342
393	0.28863	3.15522	0.664715	4.39876
392	0.28911	3.16327	0.66582	4.43595
391	0.28952	3.17136	0.666765	4.47132
390	0.28996	3.17949	0.667778	4.50795
389	0.29037	3.18766	0.668722	4.54397
388	0.29084	3.19588	0.669805	4.58223
387	0.29119	3.20413	0.670611	4.61701
386	0.29163	3.21244	0.671624	4.65503
385	0.29198	3.22078	0.67243	4.69047
384	0.2924	3.22917	0.673397	4.72851
383	0.29278	3.2376	0.674272	4.76559
382	0.29327	3.24607	0.675401	4.80661
381	0.29355	3.25459	0.676046	4.84111
380	0.29402	3.26316	0.677128	4.88223
379	0.2944	3.27177	0.678003	4.92072
378	0.29492	3.28042	0.679201	4.96427
377	0.29522	3.28912	0.679892	5.00079
376	0.29572	3.29787	0.681043	5.04448
375	0.29612	3.30667	0.681964	5.08517
374	0.29668	3.31551	0.683254	5.13175
373	0.29696	3.3244	0.683899	5.16905
372	0.29736	3.33333	0.68482	5.21086
371	0.29799	3.34232	0.686271	5.26123
370	0.29826	3.35135	0.686893	5.29929
369	0.29907	3.36043	0.688758	5.35702
368	0.29945	3.36957	0.689633	5.3999
367	0.29994	3.37875	0.690762	5.44714
366	0.30017	3.38798	0.691292	5.48535
365	0.3005	3.39726	0.692051	5.52757
364	0.30106	3.40659	0.693341	5.57871
363	0.3014	3.41598	0.694124	5.62218
362	0.30196	3.42541	0.695414	5.67429
361	0.3023	3.4349	0.696197	5.71863
360	0.30273	3.44444	0.697187	5.76682
359	0.30305	3.45404	0.697924	5.81127
358	0.30329	3.46369	0.698477	5.85305
357	0.30376	3.47339	0.699559	5.90413
356	0.30434	3.48315	0.700895	5.96006
355	0.30467	3.49296	0.701655	6.00668
354	0.30504	3.50282	0.702507	6.05532
353	0.30546	3.51275	0.703474	6.10648
352	0.30595	3.52273	0.704603	6.16095
351	0.30632	3.53276	0.705455	6.21108
350	0.3067	3.54286	0.70633	6.26215
349	0.30707	3.55301	0.707182	6.31329
348	0.3075	3.56322	0.708172	6.36742
347	0.30783	3.57349	0.708932	6.41793
346	0.30827	3.58382	0.709946	6.47355
345	0.30865	3.5942	0.710821	6.52717
344	0.30893	3.60465	0.711466	6.5771
343	0.30935	3.61516	0.712433	6.63351
342	0.30984	3.62573	0.713562	6.69351
341	0.31015	3.63636	0.714275	6.74629
340	0.31072	3.64706	0.715588	6.81102
339	0.31108	3.65782	0.716417	6.86715
338	0.31171	3.66864	0.717868	6.93585
337	0.31202	3.67953	0.718582	6.99097
336	0.3125	3.69048	0.719688	7.0543
335	0.31279	3.70149	0.720355	7.10963
334	0.31322	3.71257	0.721346	7.17193
333	0.31394	3.72372	0.723004	7.24828
332	0.31402	3.73494	0.723188	7.29575
331	0.31478	3.74622	0.724938	7.37545
330	0.31527	3.75758	0.726067	7.44337
329	0.31559	3.769	0.726804	7.50389
328	0.31618	3.78049	0.728163	7.57797
327	0.31735	3.79205	0.730857	7.68092
326	0.3174	3.80368	0.730972	7.73054
325	0.31871	3.81538	0.733989	7.84251
324	0.31904	3.82716	0.734749	7.90736
323	0.31939	3.83901	0.735555	7.97387
322	0.32106	3.85093	0.739401	8.10759
321	0.32171	3.86293	0.740898	8.19126
320	0.32267	3.875	0.743109	8.29179
319	0.31825	3.88715	0.73293	8.11685
318	0.31954	3.89937	0.735901	8.23431
317	0.32114	3.91167	0.739585	8.36953
316	0.32278	3.92405	0.743362	8.50884
315	0.3241	3.93651	0.746402	8.63314
314	0.32582	3.94904	0.750363	8.78065
313	0.3278	3.96166	0.754923	8.94458
312	0.32944	3.97436	0.7587	9.09232
311	0.33102	3.98714	0.762339	9.23888
310	0.33287	4	0.7666	9.4028
309	0.33583	4.01294	0.773416	9.63279
308	0.33855	4.02597	0.779681	9.85314
307	0.34061	4.03909	0.784425	10.0385
306	0.34292	4.05229	0.789745	10.2418
305	0.34514	4.06557	0.794857	10.4429
304	0.34741	4.07895	0.800085	10.6505
303	0.34961	4.09241	0.805152	10.8571
302	0.35162	4.10596	0.809781	11.0551
301	0.35326	4.1196	0.813558	11.2328
300	0.35326	4.1196	0.813558	11.2328

## Sheet: S105120
S105120
Wavelength (nm)	Absorbance (arb. u.)	hν (eV)	Absorption α (cm-1)	(α hν)2 (eV cm-1)2			Geometrical factor:		2.303	cm-1
1100	0.05975	1.12727	0.137604	0.0240613
1099	0.0599	1.1283	0.13795	0.0242265
1098	0.05997	1.12933	0.138111	0.0243275
1097	0.06013	1.13036	0.138479	0.0245021
1096	0.06026	1.13139	0.138779	0.0246531
1095	0.06042	1.13242	0.139147	0.0248293
1094	0.0605	1.13346	0.139331	0.0249408
1093	0.06061	1.13449	0.139585	0.0250771
1092	0.06076	1.13553	0.13993	0.0252476
1091	0.06087	1.13657	0.140184	0.0253856
1090	0.06097	1.13761	0.140414	0.0255157
1089	0.06109	1.13866	0.14069	0.0256635
1088	0.0612	1.13971	0.140944	0.0258035
1087	0.06132	1.14075	0.14122	0.0259521
1086	0.06145	1.1418	0.141519	0.0261103
1085	0.06158	1.14286	0.141819	0.0262696
1084	0.0617	1.14391	0.142095	0.0264206
1083	0.06181	1.14497	0.142348	0.026564
1082	0.06193	1.14603	0.142625	0.0267167
1081	0.06207	1.14709	0.142947	0.0268872
1080	0.06221	1.14815	0.14327	0.0270586
1079	0.06234	1.14921	0.143569	0.027222
1078	0.06245	1.15028	0.143822	0.0273691
1077	0.06257	1.15135	0.144099	0.0275255
1076	0.0627	1.15242	0.144398	0.0276914
1075	0.06283	1.15349	0.144697	0.027858
1074	0.06295	1.15456	0.144974	0.0280164
1073	0.06308	1.15564	0.145273	0.0281849
1072	0.06321	1.15672	0.145573	0.0283541
1071	0.06333	1.1578	0.145849	0.028515
1070	0.06343	1.15888	0.146079	0.0286586
1069	0.06357	1.15996	0.146402	0.0288389
1068	0.06374	1.16105	0.146793	0.0290478
1067	0.06384	1.16214	0.147024	0.0291938
1066	0.06398	1.16323	0.147346	0.029377
1065	0.0642	1.16432	0.147853	0.0296348
1064	0.0644	1.16541	0.148313	0.0298756
1063	0.06451	1.16651	0.148567	0.0300344
1062	0.06463	1.16761	0.148843	0.0302031
1061	0.06479	1.16871	0.149211	0.0304101
1060	0.0649	1.16981	0.149465	0.0305709
1059	0.06505	1.17092	0.14981	0.0307707
1058	0.06517	1.17202	0.150087	0.0309424
1057	0.06532	1.17313	0.150432	0.0311439
1056	0.06546	1.17424	0.150754	0.0313367
1055	0.06557	1.17536	0.151008	0.0315021
1054	0.06573	1.17647	0.151376	0.0317159
1053	0.06585	1.17759	0.151653	0.0318924
1052	0.06597	1.17871	0.151929	0.0320697
1051	0.06611	1.17983	0.152251	0.0322672
1050	0.06628	1.18095	0.152643	0.032495
1049	0.06641	1.18208	0.152942	0.032685
1048	0.06652	1.18321	0.153196	0.0328561
1047	0.06667	1.18434	0.153541	0.0330675
1046	0.06681	1.18547	0.153863	0.0332699
1045	0.06695	1.1866	0.154186	0.0334732
1044	0.06707	1.18774	0.154462	0.0336579
1043	0.06723	1.18888	0.154831	0.0338836
1042	0.06735	1.19002	0.155107	0.03407
1041	0.06752	1.19116	0.155499	0.0343078
1040	0.06764	1.19231	0.155775	0.0344964
1039	0.06776	1.19346	0.156051	0.0346857
1038	0.06792	1.19461	0.15642	0.0349169
1037	0.06807	1.19576	0.156765	0.0351388
1036	0.0682	1.19691	0.157065	0.0353411
1035	0.06832	1.19807	0.157341	0.0355343
1034	0.06846	1.19923	0.157663	0.0357492
1033	0.06859	1.20039	0.157963	0.0359546
1032	0.06873	1.20155	0.158285	0.0361713
1031	0.06889	1.20272	0.158654	0.0364107
1030	0.06903	1.20388	0.158976	0.0366294
1029	0.06917	1.20505	0.159299	0.0368497
1028	0.06931	1.20623	0.159621	0.0370715
1027	0.06944	1.2074	0.15992	0.0372829
1026	0.06958	1.20858	0.160243	0.0375066
1025	0.06972	1.20976	0.160565	0.0377312
1024	0.06986	1.21094	0.160888	0.0379569
1023	0.07001	1.21212	0.161233	0.0381944
1022	0.07018	1.21331	0.161625	0.0384555
1021	0.07035	1.2145	0.162016	0.0387178
1020	0.07049	1.21569	0.162338	0.0389483
1019	0.07064	1.21688	0.162684	0.0391909
1018	0.07077	1.21807	0.162983	0.0394122
1017	0.07093	1.21927	0.163352	0.0396687
1016	0.07105	1.22047	0.163628	0.0398814
1015	0.07121	1.22167	0.163997	0.04014
1014	0.07137	1.22288	0.164365	0.0404005
1013	0.07152	1.22409	0.164711	0.0406508
1012	0.07166	1.2253	0.165033	0.0408909
1011	0.07182	1.22651	0.165401	0.0411548
1010	0.07206	1.22772	0.165954	0.0415121
1009	0.07228	1.22894	0.166461	0.041849
1008	0.07243	1.23016	0.166806	0.0421064
1007	0.07257	1.23138	0.167129	0.0423532
1006	0.07273	1.2326	0.167497	0.0426245
1005	0.07288	1.23383	0.167843	0.042886
1004	0.07303	1.23506	0.168188	0.0431486
1003	0.07319	1.23629	0.168557	0.0434242
1002	0.07337	1.23752	0.168971	0.043725
1001	0.07353	1.23876	0.16934	0.0440039
1000	0.07369	1.24	0.169708	0.0442842
999	0.07386	1.24124	0.1701	0.0445777
998	0.07403	1.24248	0.170491	0.0448727
997	0.07419	1.24373	0.17086	0.0451576
996	0.07436	1.24498	0.171251	0.045456
995	0.07451	1.24623	0.171597	0.0457313
994	0.07466	1.24748	0.171942	0.0460078
993	0.07483	1.24874	0.172333	0.0463109
992	0.07501	1.25	0.172748	0.0466279
991	0.07519	1.25126	0.173163	0.0469465
990	0.07537	1.25253	0.173577	0.0472673
989	0.07554	1.25379	0.173969	0.0475764
988	0.0757	1.25506	0.174337	0.047875
987	0.07588	1.25633	0.174752	0.0482003
986	0.07605	1.25761	0.175143	0.0485153
985	0.0762	1.25888	0.175489	0.0488052
984	0.07638	1.26016	0.175903	0.0491359
983	0.07656	1.26144	0.176318	0.0494681
982	0.07674	1.26273	0.176732	0.0498027
981	0.07691	1.26402	0.177124	0.0501258
980	0.07709	1.26531	0.177538	0.0504636
979	0.07727	1.2666	0.177953	0.0508029
978	0.07745	1.26789	0.178367	0.0511439
977	0.07762	1.26919	0.178759	0.0514741
976	0.07782	1.27049	0.179219	0.0518457
975	0.078	1.27179	0.179634	0.0521925
974	0.07817	1.2731	0.180026	0.0525283
973	0.07834	1.27441	0.180417	0.0528656
972	0.07854	1.27572	0.180878	0.0532452
971	0.07871	1.27703	0.181269	0.0535858
970	0.0789	1.27835	0.181707	0.0539562
969	0.07908	1.27967	0.182121	0.0543147
968	0.07926	1.28099	0.182536	0.0546748
967	0.07944	1.28232	0.18295	0.0550376
966	0.07965	1.28364	0.183434	0.0554429
965	0.07982	1.28497	0.183825	0.0557953
964	0.08004	1.28631	0.184332	0.0562203
963	0.08021	1.28764	0.184724	0.0565762
962	0.08044	1.28898	0.185253	0.0570196
961	0.08064	1.29032	0.185714	0.0574227
960	0.08086	1.29167	0.186221	0.0578573
959	0.08108	1.29301	0.186727	0.0582934
958	0.0813	1.29436	0.187234	0.0587326
957	0.08148	1.29572	0.187648	0.059117
956	0.08167	1.29707	0.188086	0.0595168
955	0.08205	1.29843	0.188961	0.060198
954	0.0823	1.29979	0.189537	0.0606923
953	0.08249	1.30115	0.189974	0.0611006
952	0.08271	1.30252	0.190481	0.0615563
951	0.08292	1.30389	0.190965	0.0619995
950	0.08311	1.30526	0.191402	0.0624149
949	0.08331	1.30664	0.191863	0.0628484
948	0.08352	1.30802	0.192347	0.0632991
947	0.08374	1.3094	0.192853	0.0637674
946	0.08394	1.31078	0.193314	0.0642074
945	0.08417	1.31217	0.193844	0.0646968
944	0.08438	1.31356	0.194327	0.0651579
943	0.08458	1.31495	0.194788	0.0656057
942	0.08481	1.31635	0.195317	0.0661035
941	0.08505	1.31775	0.19587	0.0666197
940	0.08527	1.31915	0.196377	0.0671071
939	0.0855	1.32055	0.196907	0.0676129
938	0.08575	1.32196	0.197482	0.0681542
937	0.08597	1.32337	0.197989	0.0686506
936	0.0862	1.32479	0.198519	0.0691666
935	0.08643	1.3262	0.199048	0.0696843
934	0.08667	1.32762	0.199601	0.070222
933	0.08691	1.32905	0.200154	0.0707636
932	0.08716	1.33047	0.200729	0.0713235
931	0.08737	1.3319	0.201213	0.0718217
930	0.08759	1.33333	0.20172	0.072339
929	0.08782	1.33477	0.202249	0.0728765
928	0.08804	1.33621	0.202756	0.0734002
927	0.08828	1.33765	0.203309	0.0739601
926	0.08853	1.33909	0.203885	0.0745398
925	0.08876	1.34054	0.204414	0.07509
924	0.08903	1.34199	0.205036	0.075711
923	0.08928	1.34345	0.205612	0.0763026
922	0.08952	1.3449	0.206165	0.0768791
921	0.08976	1.34636	0.206717	0.0774597
920	0.09001	1.34783	0.207293	0.078062
919	0.09027	1.34929	0.207892	0.0786838
918	0.09054	1.35076	0.208514	0.0793278
917	0.09077	1.35224	0.209043	0.0799061
916	0.09104	1.35371	0.209665	0.0805571
915	0.09131	1.35519	0.210287	0.0812129
914	0.09159	1.35667	0.210932	0.0818903
913	0.09186	1.35816	0.211554	0.0825549
912	0.09217	1.35965	0.212268	0.0832955
911	0.09245	1.36114	0.212912	0.0839861
910	0.09274	1.36264	0.21358	0.0847002
909	0.09301	1.36414	0.214202	0.0853818
908	0.0933	1.36564	0.21487	0.0861041
907	0.09357	1.36714	0.215492	0.0867935
906	0.09388	1.36865	0.216206	0.0875626
905	0.09418	1.37017	0.216897	0.088319
904	0.09445	1.37168	0.217518	0.089022
903	0.09477	1.3732	0.218255	0.089825
902	0.09507	1.37472	0.218946	0.0905948
901	0.09538	1.37625	0.21966	0.0913897
900	0.09568	1.37778	0.220351	0.0921701
899	0.09629	1.37931	0.221756	0.0935565
898	0.09656	1.38085	0.222378	0.0942921
897	0.09692	1.38239	0.223207	0.0952085
896	0.09718	1.38393	0.223806	0.0959334
895	0.09755	1.38547	0.224658	0.0968806
894	0.09788	1.38702	0.225418	0.0977555
893	0.0982	1.38858	0.226155	0.0986172
892	0.09856	1.39013	0.226984	0.0995635
891	0.09886	1.39169	0.227675	0.100395
890	0.09921	1.39326	0.228481	0.101336
889	0.09952	1.39483	0.229195	0.1022
888	0.09987	1.3964	0.230001	0.103152
887	0.10024	1.39797	0.230853	0.104152
886	0.10061	1.39955	0.231705	0.105159
885	0.10094	1.40113	0.232465	0.106089
884	0.10133	1.40271	0.233363	0.107152
883	0.10171	1.4043	0.234238	0.108202
882	0.10205	1.4059	0.235021	0.109175
881	0.10244	1.40749	0.235919	0.11026
880	0.10284	1.40909	0.236841	0.111375
879	0.10324	1.41069	0.237762	0.112499
878	0.10362	1.4123	0.238637	0.113587
877	0.10399	1.41391	0.239489	0.114661
876	0.10439	1.41553	0.24041	0.115809
875	0.10479	1.41714	0.241331	0.116964
874	0.10518	1.41876	0.24223	0.118106
873	0.10552	1.42039	0.243013	0.119144
872	0.10591	1.42202	0.243911	0.120302
871	0.10633	1.42365	0.244878	0.121536
870	0.10673	1.42529	0.245799	0.122735
869	0.10713	1.42693	0.24672	0.123941
868	0.10753	1.42857	0.247642	0.125156
867	0.10793	1.43022	0.248563	0.12638
866	0.10836	1.43187	0.249553	0.127683
865	0.10895	1.43353	0.250912	0.129377
864	0.10954	1.43519	0.252271	0.131085
863	0.10998	1.43685	0.253284	0.132446
862	0.11042	1.43852	0.254297	0.133818
861	0.11087	1.44019	0.255334	0.135225
860	0.11128	1.44186	0.256278	0.136543
859	0.11172	1.44354	0.257291	0.137945
858	0.11217	1.44522	0.258328	0.139383
857	0.1126	1.44691	0.259318	0.140782
856	0.11304	1.4486	0.260331	0.142216
855	0.1135	1.45029	0.261391	0.143711
854	0.11393	1.45199	0.262381	0.145141
853	0.11435	1.45369	0.263348	0.146556
852	0.11481	1.4554	0.264407	0.148085
851	0.11526	1.45711	0.265444	0.149599
850	0.1157	1.45882	0.266457	0.151098
849	0.11614	1.46054	0.26747	0.152608
848	0.11663	1.46226	0.268599	0.154262
847	0.11709	1.46399	0.269658	0.155849
846	0.11755	1.46572	0.270718	0.157447
845	0.11797	1.46746	0.271685	0.158951
844	0.11837	1.46919	0.272606	0.160408
843	0.11883	1.47094	0.273665	0.162043
842	0.11925	1.47268	0.274633	0.163577
841	0.11968	1.47444	0.275623	0.165153
840	0.12016	1.47619	0.276728	0.166875
839	0.12061	1.47795	0.277765	0.168529
838	0.12107	1.47971	0.278824	0.170221
837	0.12152	1.48148	0.279861	0.1719
836	0.122	1.48325	0.280966	0.173675
835	0.12246	1.48503	0.282025	0.175407
834	0.12295	1.48681	0.283154	0.177238
833	0.12336	1.4886	0.284098	0.178852
832	0.12385	1.49038	0.285227	0.180707
831	0.12432	1.49218	0.286309	0.182521
830	0.12476	1.49398	0.287322	0.184259
829	0.12528	1.49578	0.28852	0.186246
828	0.1258	1.49758	0.289717	0.188248
827	0.12627	1.4994	0.2908	0.190118
826	0.12678	1.50121	0.291974	0.19212
825	0.12729	1.50303	0.293149	0.194139
824	0.12774	1.50485	0.294185	0.195987
823	0.12826	1.50668	0.295383	0.198067
822	0.12877	1.50852	0.296557	0.200133
821	0.1292	1.51035	0.297548	0.201961
820	0.12973	1.5122	0.298768	0.204121
819	0.13022	1.51404	0.299897	0.206166
818	0.13069	1.51589	0.300979	0.208165
817	0.13123	1.51775	0.302223	0.210404
816	0.13175	1.51961	0.30342	0.212595
815	0.13227	1.52147	0.304618	0.214802
814	0.13281	1.52334	0.305861	0.217092
813	0.13333	1.52522	0.307059	0.219335
812	0.13388	1.52709	0.308326	0.221691
811	0.13445	1.52898	0.309638	0.224137
810	0.13529	1.53086	0.311573	0.227505
809	0.13604	1.53276	0.3133	0.230605
808	0.1366	1.53465	0.31459	0.233082
807	0.13715	1.53656	0.315856	0.235548
806	0.13773	1.53846	0.317192	0.238132
805	0.13831	1.54037	0.318528	0.240738
804	0.13887	1.54229	0.319818	0.243297
803	0.13948	1.54421	0.321222	0.246051
802	0.14009	1.54613	0.322627	0.248825
801	0.14066	1.54806	0.32394	0.251481
800	0.14125	1.55	0.325299	0.254231
799	0.14187	1.55194	0.326727	0.25711
798	0.14247	1.55388	0.328108	0.259938
797	0.1431	1.55583	0.329559	0.262901
796	0.14375	1.55779	0.331056	0.265963
795	0.14439	1.55975	0.33253	0.269012
794	0.14502	1.56171	0.333981	0.272047
793	0.14567	1.56368	0.335478	0.275184
792	0.14634	1.56566	0.337021	0.278425
791	0.14699	1.56764	0.338518	0.281615
790	0.14762	1.56962	0.339969	0.284752
789	0.14829	1.57161	0.341512	0.288072
788	0.14891	1.5736	0.34294	0.291222
787	0.14958	1.5756	0.344483	0.294596
786	0.15025	1.57761	0.346026	0.298
785	0.15095	1.57962	0.347638	0.30155
784	0.15163	1.58163	0.349204	0.305048
783	0.15232	1.58365	0.350793	0.308617
782	0.15301	1.58568	0.352382	0.312218
781	0.15375	1.58771	0.354086	0.316053
780	0.15445	1.58974	0.355698	0.319754
779	0.15516	1.59178	0.357333	0.323529
778	0.15592	1.59383	0.359084	0.327548
777	0.1566	1.59588	0.36065	0.331262
776	0.15736	1.59794	0.3624	0.335349
775	0.15813	1.6	0.364173	0.339513
774	0.15886	1.60207	0.365855	0.343542
773	0.15962	1.60414	0.367605	0.347734
772	0.16045	1.60622	0.369516	0.352271
771	0.16121	1.6083	0.371267	0.356538
770	0.16198	1.61039	0.37304	0.360888
769	0.16277	1.61248	0.374859	0.365364
768	0.16358	1.61458	0.376725	0.369971
767	0.16433	1.61669	0.378452	0.374348
766	0.16517	1.6188	0.380387	0.379172
765	0.16597	1.62092	0.382229	0.383858
764	0.16675	1.62304	0.384025	0.388488
763	0.16755	1.62516	0.385868	0.39325
762	0.1684	1.6273	0.387825	0.398297
761	0.16925	1.62943	0.389783	0.403382
760	0.1701	1.63158	0.39174	0.40852
759	0.1709	1.63373	0.393583	0.413459
758	0.17172	1.63588	0.395471	0.418536
757	0.17255	1.63804	0.397383	0.423708
756	0.17338	1.64021	0.399294	0.428928
755	0.17493	1.64238	0.402864	0.437788
754	0.176	1.64456	0.405328	0.444337
753	0.17685	1.64675	0.407286	0.449835
752	0.17773	1.64894	0.409312	0.455532
751	0.17863	1.65113	0.411385	0.46138
750	0.17955	1.65333	0.413504	0.467388
749	0.18047	1.65554	0.415622	0.473453
748	0.18136	1.65775	0.417672	0.479412
747	0.18229	1.65997	0.419814	0.48564
746	0.1832	1.6622	0.42191	0.491819
745	0.1841	1.66443	0.423982	0.497997
744	0.18506	1.66667	0.426193	0.504559
743	0.18603	1.66891	0.428427	0.511234
742	0.18698	1.67116	0.430615	0.517862
741	0.18793	1.67341	0.432803	0.524548
740	0.1889	1.67568	0.435037	0.531415
739	0.18988	1.67794	0.437294	0.538393
738	0.19088	1.68022	0.439597	0.545558
737	0.19187	1.6825	0.441877	0.552729
736	0.19284	1.68478	0.444111	0.559846
735	0.19384	1.68707	0.446414	0.567206
734	0.19483	1.68937	0.448693	0.574578
733	0.19581	1.69168	0.45095	0.581961
732	0.19682	1.69399	0.453276	0.589587
731	0.19782	1.69631	0.455579	0.597226
730	0.19884	1.69863	0.457929	0.605052
729	0.19987	1.70096	0.460301	0.613015
728	0.2009	1.7033	0.462673	0.621055
727	0.20192	1.70564	0.465022	0.629102
726	0.20296	1.70799	0.467417	0.637352
725	0.204	1.71034	0.469812	0.645674
724	0.20504	1.71271	0.472207	0.654083
723	0.20608	1.71508	0.474602	0.662565
722	0.20715	1.71745	0.477066	0.671314
721	0.20819	1.71983	0.479462	0.679953
720	0.20928	1.72222	0.481972	0.689002
719	0.21038	1.72462	0.484505	0.698206
718	0.21145	1.72702	0.486969	0.707291
717	0.21257	1.72943	0.489549	0.7168
716	0.21369	1.73184	0.492128	0.726393
715	0.21482	1.73427	0.49473	0.736157
714	0.216	1.73669	0.497448	0.746346
713	0.21711	1.73913	0.500004	0.756156
712	0.21822	1.74157	0.502561	0.766053
711	0.21937	1.74402	0.505209	0.776328
710	0.22056	1.74648	0.50795	0.786989
709	0.22172	1.74894	0.510621	0.797531
708	0.22287	1.75141	0.51327	0.808103
707	0.2241	1.75389	0.516102	0.819363
706	0.22526	1.75637	0.518774	0.83021
705	0.22651	1.75887	0.521653	0.841841
704	0.22769	1.76136	0.52437	0.853045
703	0.22883	1.76387	0.526995	0.864066
702	0.23003	1.76638	0.529759	0.875639
701	0.23114	1.7689	0.532315	0.886635
700	0.23232	1.77143	0.535033	0.898274
699	0.23379	1.77396	0.538418	0.912278
698	0.235	1.7765	0.541205	0.924387
697	0.23622	1.77905	0.544015	0.936694
696	0.23747	1.78161	0.546893	0.949359
695	0.23872	1.78417	0.549772	0.962139
694	0.23996	1.78674	0.552628	0.974963
693	0.24123	1.78932	0.555553	0.988158
692	0.24249	1.79191	0.558454	1.0014
691	0.24373	1.7945	0.56131	1.0146
690	0.24577	1.7971	0.566008	1.03464
689	0.24756	1.79971	0.570131	1.05282
688	0.24887	1.80233	0.573148	1.06709
687	0.25019	1.80495	0.576188	1.08158
686	0.25152	1.80758	0.579251	1.0963
685	0.25287	1.81022	0.58236	1.11134
684	0.2542	1.81287	0.585423	1.12635
683	0.25554	1.81552	0.588509	1.14158
682	0.25688	1.81818	0.591595	1.15697
681	0.25821	1.82085	0.594658	1.17242
680	0.25954	1.82353	0.597721	1.18802
679	0.26089	1.82622	0.60083	1.20395
678	0.26223	1.82891	0.603916	1.21994
677	0.26358	1.83161	0.607025	1.23617
676	0.26497	1.83432	0.610226	1.25294
675	0.26635	1.83704	0.613404	1.26979
674	0.26774	1.83976	0.616605	1.28688
673	0.26911	1.8425	0.61976	1.30395
672	0.27049	1.84524	0.622938	1.32128
671	0.27186	1.84799	0.626094	1.33868
670	0.27324	1.85075	0.629272	1.35635
669	0.27466	1.85351	0.632542	1.37458
668	0.27608	1.85629	0.635812	1.39299
667	0.27752	1.85907	0.639129	1.41178
666	0.27895	1.86186	0.642422	1.43065
665	0.2804	1.86466	0.645761	1.44992
664	0.28185	1.86747	0.649101	1.46937
663	0.28331	1.87029	0.652463	1.48912
662	0.28479	1.87311	0.655871	1.50926
661	0.28627	1.87595	0.65928	1.52961
660	0.28772	1.87879	0.662619	1.54983
659	0.28921	1.88164	0.666051	1.57068
658	0.29066	1.8845	0.66939	1.59129
657	0.29216	1.88737	0.672844	1.61266
656	0.29368	1.89024	0.676345	1.63445
655	0.29518	1.89313	0.6798	1.65624
654	0.29671	1.89602	0.683323	1.67856
653	0.29818	1.89893	0.686709	1.70045
652	0.29971	1.90184	0.690232	1.72321
651	0.30118	1.90476	0.693618	1.7455
650	0.30271	1.90769	0.697141	1.76871
649	0.30416	1.91063	0.70048	1.7912
648	0.30566	1.91358	0.703935	1.81451
647	0.30715	1.91654	0.707366	1.83791
646	0.30867	1.9195	0.710867	1.86189
645	0.31016	1.92248	0.714298	1.88575
644	0.31164	1.92547	0.717707	1.90971
643	0.31321	1.92846	0.721323	1.935
642	0.31473	1.93146	0.724823	1.95991
641	0.31625	1.93448	0.728324	1.98508
640	0.31783	1.9375	0.731962	2.01123
639	0.31933	1.94053	0.735417	2.03661
638	0.3209	1.94357	0.739033	2.06314
637	0.32239	1.94662	0.742464	2.08888
636	0.32391	1.94969	0.745965	2.11528
635	0.32542	1.95276	0.749442	2.14178
634	0.32826	1.95584	0.755983	2.1862
633	0.33005	1.95893	0.760105	2.2171
632	0.33162	1.96203	0.763721	2.24533
631	0.33319	1.96513	0.767337	2.27381
630	0.33474	1.96825	0.770906	2.30231
629	0.33632	1.97138	0.774545	2.33149
628	0.33782	1.97452	0.777999	2.35984
627	0.33934	1.97767	0.7815	2.38872
626	0.34086	1.98083	0.785001	2.41788
625	0.34238	1.984	0.788501	2.4473
624	0.34387	1.98718	0.791933	2.47657
623	0.34544	1.99037	0.795548	2.50727
622	0.34698	1.99357	0.799095	2.53781
621	0.34849	1.99678	0.802572	2.5682
620	0.34999	2	0.806027	2.59872
619	0.35149	2.00323	0.809481	2.62951
618	0.35299	2.00647	0.812936	2.66059
617	0.3545	2.00972	0.816413	2.6921
616	0.35601	2.01299	0.819891	2.72393
615	0.35753	2.01626	0.823392	2.75617
614	0.35902	2.01954	0.826823	2.78824
613	0.36051	2.02284	0.830255	2.82063
612	0.36204	2.02614	0.833778	2.85391
611	0.36355	2.02946	0.837256	2.8872
610	0.36505	2.03279	0.84071	2.92064
609	0.36658	2.03612	0.844234	2.95483
608	0.36807	2.03947	0.847665	2.98871
607	0.36957	2.04283	0.85112	3.02305
606	0.3711	2.0462	0.854643	3.0582
605	0.37263	2.04959	0.858167	3.0937
604	0.37415	2.05298	0.861667	3.12931
603	0.37566	2.05638	0.865145	3.16508
602	0.37719	2.0598	0.868669	3.20154
601	0.37872	2.06323	0.872192	3.23832
600	0.38024	2.06667	0.875693	3.27526
599	0.38177	2.07012	0.879216	3.3127
598	0.38328	2.07358	0.882694	3.35013
597	0.38478	2.07705	0.886148	3.38771
596	0.38628	2.08054	0.889603	3.42566
595	0.38775	2.08403	0.892988	3.46337
594	0.38921	2.08754	0.896351	3.50127
593	0.39071	2.09106	0.899805	3.54022
592	0.39218	2.09459	0.903191	3.57896
591	0.39371	2.09814	0.906714	3.61918
590	0.39523	2.10169	0.910215	3.65953
589	0.39671	2.10526	0.913623	3.69952
588	0.39823	2.10884	0.917124	3.74062
587	0.39974	2.11244	0.920601	3.78192
586	0.40128	2.11604	0.924148	3.82411
585	0.40279	2.11966	0.927625	3.86614
584	0.40428	2.12329	0.931057	3.90815
583	0.40583	2.12693	0.934626	3.95169
582	0.40733	2.13058	0.938081	3.99463
581	0.40885	2.13425	0.941582	4.03837
580	0.41069	2.13793	0.945819	4.08887
579	0.4135	2.14162	0.95229	4.15933
578	0.41506	2.14533	0.955883	4.20531
577	0.41658	2.14905	0.959384	4.25087
576	0.41816	2.15278	0.963022	4.29806
575	0.41969	2.15652	0.966546	4.34462
574	0.42128	2.16028	0.970208	4.39288
573	0.42278	2.16405	0.973662	4.43968
572	0.42436	2.16783	0.977301	4.48856
571	0.42586	2.17163	0.980756	4.53621
570	0.42748	2.17544	0.984486	4.58684
569	0.42899	2.17926	0.987964	4.63554
568	0.43061	2.1831	0.991695	4.68709
567	0.43216	2.18695	0.995264	4.73756
566	0.4337	2.19081	0.998811	4.78824
565	0.43529	2.19469	1.00247	4.84052
564	0.43681	2.19858	1.00597	4.89167
563	0.43833	2.20249	1.00947	4.94331
562	0.43981	2.20641	1.01288	4.99448
561	0.44138	2.21034	1.0165	5.04814
560	0.44297	2.21429	1.02016	5.10276
559	0.44449	2.21825	1.02366	5.15624
558	0.44605	2.22222	1.02725	5.2111
557	0.44764	2.22621	1.03091	5.26718
556	0.44915	2.23022	1.03439	5.32189
555	0.45073	2.23423	1.03803	5.37869
554	0.45232	2.23827	1.04169	5.43631
553	0.45391	2.24231	1.04535	5.49438
552	0.45538	2.24638	1.04874	5.55012
551	0.45697	2.25045	1.0524	5.60921
550	0.45849	2.25455	1.0559	5.66718
549	0.46008	2.25865	1.05956	5.72733
548	0.4616	2.26277	1.06306	5.78629
547	0.46315	2.26691	1.06663	5.84655
546	0.46471	2.27106	1.07023	5.90757
545	0.4663	2.27523	1.07389	5.96993
544	0.46782	2.27941	1.07739	6.03101
543	0.46936	2.28361	1.08094	6.09318
542	0.47086	2.28782	1.08439	6.15482
541	0.47238	2.29205	1.08789	6.21755
540	0.47384	2.2963	1.09125	6.27926
539	0.4753	2.30056	1.09462	6.34148
538	0.47676	2.30483	1.09798	6.40421
537	0.47821	2.30912	1.10132	6.46723
536	0.47967	2.31343	1.10468	6.53109
535	0.48109	2.31776	1.10795	6.59443
534	0.48256	2.3221	1.11134	6.65966
533	0.48399	2.32645	1.11463	6.72432
532	0.48541	2.33083	1.1179	6.78932
531	0.48682	2.33522	1.12115	6.85457
530	0.48817	2.33962	1.12426	6.91864
529	0.48952	2.34405	1.12736	6.98333
528	0.49091	2.34848	1.13057	7.04961
527	0.49227	2.35294	1.1337	7.11568
526	0.49359	2.35741	1.13674	7.1811
525	0.49569	2.3619	1.14157	7.26995
524	0.49762	2.36641	1.14602	7.35468
523	0.49892	2.37094	1.14901	7.42149
522	0.50019	2.37548	1.15194	7.48791
521	0.50145	2.38004	1.15484	7.5546
520	0.50274	2.38462	1.15781	7.62278
519	0.50397	2.38921	1.16064	7.68964
518	0.5052	2.39382	1.16348	7.75707
517	0.50644	2.39845	1.16633	7.82538
516	0.50762	2.4031	1.16905	7.8924
515	0.50877	2.40777	1.1717	7.95904
514	0.50998	2.41245	1.17448	8.02806
513	0.51114	2.41715	1.17716	8.09608
512	0.51228	2.42188	1.17978	8.16409
511	0.51343	2.42661	1.18243	8.23285
510	0.51451	2.43137	1.18492	8.29999
509	0.51556	2.43615	1.18733	8.3667
508	0.51662	2.44094	1.18978	8.43421
507	0.51765	2.44576	1.19215	8.50135
506	0.51869	2.45059	1.19454	8.56929
505	0.5197	2.45545	1.19687	8.63685
504	0.52072	2.46032	1.19922	8.70522
503	0.52172	2.46521	1.20152	8.77346
502	0.52266	2.47012	1.20369	8.84021
501	0.52358	2.47505	1.2058	8.9068
500	0.5245	2.48	1.20792	8.97392
499	0.52538	2.48497	1.20995	9.04018
498	0.52636	2.48996	1.21221	9.11042
497	0.52724	2.49497	1.21423	9.17773
496	0.52805	2.5	1.2161	9.24311
495	0.52894	2.50505	1.21815	9.3118
494	0.52974	2.51012	1.21999	9.37783
493	0.53061	2.51521	1.22199	9.44685
492	0.53143	2.52033	1.22388	9.51469
491	0.53224	2.52546	1.22575	9.58261
490	0.53298	2.53061	1.22745	9.64851
489	0.53381	2.53579	1.22936	9.71825
488	0.53462	2.54098	1.23123	9.7877
487	0.53533	2.5462	1.23286	9.85408
486	0.53608	2.55144	1.23459	9.92242
485	0.53675	2.5567	1.23614	9.9883
484	0.53746	2.56198	1.23777	10.0561
483	0.53822	2.56729	1.23952	10.1265
482	0.53886	2.57261	1.24099	10.1927
481	0.53963	2.57796	1.24277	10.2644
480	0.54028	2.58333	1.24426	10.332
479	0.54093	2.58873	1.24576	10.4002
478	0.54147	2.59414	1.24701	10.4646
477	0.54216	2.59958	1.24859	10.5354
476	0.54278	2.60504	1.25002	10.6039
475	0.54342	2.61053	1.2515	10.6737
474	0.54412	2.61603	1.25311	10.7464
473	0.54474	2.62156	1.25454	10.8165
472	0.54524	2.62712	1.25569	10.8824
471	0.54585	2.6327	1.25709	10.9531
470	0.54657	2.6383	1.25875	11.0288
469	0.54804	2.64392	1.26214	11.1355
468	0.54865	2.64957	1.26354	11.208
467	0.54923	2.65525	1.26488	11.28
466	0.5498	2.66094	1.26619	11.3519
465	0.55048	2.66667	1.26776	11.429
464	0.55113	2.67241	1.26925	11.5054
463	0.55178	2.67819	1.27075	11.5825
462	0.5525	2.68398	1.27241	11.663
461	0.55311	2.6898	1.27381	11.7395
460	0.55368	2.69565	1.27513	11.815
459	0.55424	2.70153	1.27641	11.8906
458	0.55486	2.70742	1.27784	11.9692
457	0.55566	2.71335	1.27968	12.0564
456	0.55631	2.7193	1.28118	12.1377
455	0.55709	2.72527	1.28298	12.2252
454	0.55805	2.73128	1.28519	12.3216
453	0.5587	2.73731	1.28669	12.4049
452	0.55938	2.74336	1.28825	12.4901
451	0.56	2.74945	1.28968	12.5735
450	0.5606	2.75556	1.29106	12.6565
449	0.56122	2.76169	1.29249	12.741
448	0.56181	2.76786	1.29385	12.8249
447	0.56249	2.77405	1.29541	12.9136
446	0.5631	2.78027	1.29682	12.9997
445	0.56367	2.78652	1.29813	13.0846
444	0.56427	2.79279	1.29951	13.1716
443	0.56496	2.7991	1.3011	13.2636
442	0.56564	2.80543	1.30267	13.3557
441	0.56619	2.81179	1.30394	13.4424
440	0.56679	2.81818	1.30532	13.5322
439	0.56751	2.8246	1.30698	13.6285
438	0.56807	2.83105	1.30827	13.7179
437	0.56864	2.83753	1.30958	13.8084
436	0.56928	2.84404	1.31105	13.9031
435	0.56982	2.85057	1.3123	13.9935
434	0.57042	2.85714	1.31368	14.0877
433	0.57095	2.86374	1.3149	14.1792
432	0.57154	2.87037	1.31626	14.2744
431	0.57203	2.87703	1.31739	14.3653
430	0.57268	2.88372	1.31888	14.465
429	0.57319	2.89044	1.32006	14.5584
428	0.57374	2.8972	1.32132	14.6546
427	0.57417	2.90398	1.32231	14.7454
426	0.5748	2.9108	1.32376	14.8473
425	0.57532	2.91765	1.32496	14.9442
424	0.57574	2.92453	1.32593	15.0367
423	0.57607	2.93144	1.32669	15.1252
422	0.57656	2.93839	1.32782	15.2228
421	0.57703	2.94537	1.3289	15.3202
420	0.57748	2.95238	1.32994	15.4172
419	0.57796	2.95943	1.33104	15.5167
418	0.5784	2.96651	1.33206	15.6148
417	0.57873	2.97362	1.33282	15.7076
416	0.57914	2.98077	1.33376	15.8056
415	0.57948	2.98795	1.33454	15.9005
414	0.57982	2.99517	1.33533	15.9962
413	0.58005	3.00242	1.33586	16.0865
412	0.58058	3.00971	1.33708	16.1943
411	0.58098	3.01703	1.338	16.2956
410	0.58132	3.02439	1.33878	16.3943
409	0.58182	3.03178	1.33993	16.5029
408	0.58191	3.03922	1.34014	16.5891
407	0.58199	3.04668	1.34032	16.6753
406	0.58243	3.05419	1.34134	16.7829
405	0.58271	3.06173	1.34198	16.8821
404	0.58294	3.06931	1.34251	16.9792
403	0.58305	3.07692	1.34276	17.0699
402	0.58341	3.08458	1.34359	17.1762
401	0.5835	3.09227	1.3438	17.2673
400	0.58373	3.1	1.34433	17.3674
399	0.58415	3.10777	1.3453	17.4797
398	0.58432	3.11558	1.34569	17.5779
397	0.58455	3.12343	1.34622	17.6805
396	0.58476	3.13131	1.3467	17.7826
395	0.58491	3.13924	1.34705	17.882
394	0.58501	3.14721	1.34728	17.979
393	0.58504	3.15522	1.34735	18.0725
392	0.58528	3.16327	1.3479	18.1797
391	0.58537	3.17136	1.34811	18.2785
390	0.58567	3.17949	1.3488	18.3911
389	0.58552	3.18766	1.34845	18.4763
388	0.58568	3.19588	1.34882	18.5819
387	0.5859	3.20413	1.34933	18.692
386	0.58594	3.21244	1.34942	18.7916
385	0.586	3.22078	1.34956	18.8932
384	0.58629	3.22917	1.35023	19.0105
383	0.58624	3.2376	1.35011	19.1067
382	0.58611	3.24607	1.34981	19.1983
381	0.58637	3.25459	1.35041	19.3163
380	0.58651	3.26316	1.35073	19.4274
379	0.58645	3.27177	1.35059	19.5261
378	0.58663	3.28042	1.35101	19.6415
377	0.58681	3.28912	1.35142	19.758
376	0.58682	3.29787	1.35145	19.8639
375	0.58649	3.30667	1.35069	19.9476
374	0.58718	3.31551	1.35228	20.1016
373	0.58646	3.3244	1.35062	20.16
372	0.58694	3.33333	1.35172	20.3017
371	0.58688	3.34232	1.35158	20.4072
370	0.58704	3.35135	1.35195	20.5288
369	0.58706	3.36043	1.352	20.6416
368	0.58709	3.36957	1.35207	20.7561
367	0.58704	3.37875	1.35195	20.8658
366	0.58729	3.38798	1.35253	20.9978
365	0.58734	3.39726	1.35264	21.1166
364	0.58729	3.40659	1.35253	21.2292
363	0.58735	3.41598	1.35267	21.3507
362	0.58737	3.42541	1.35271	21.4702
361	0.58727	3.4349	1.35248	21.582
360	0.58747	3.44444	1.35294	21.7168
359	0.58759	3.45404	1.35322	21.847
358	0.58755	3.46369	1.35313	21.9662
357	0.58738	3.47339	1.35274	22.0767
356	0.58757	3.48315	1.35317	22.2153
355	0.58789	3.49296	1.35391	22.3649
354	0.58769	3.50282	1.35345	22.4761
353	0.58801	3.51275	1.35419	22.6283
352	0.58791	3.52273	1.35396	22.7493
351	0.58786	3.53276	1.35384	22.8752
350	0.58802	3.54286	1.35421	23.0187
349	0.58813	3.55301	1.35446	23.1594
348	0.58818	3.56322	1.35458	23.2967
347	0.58834	3.57349	1.35495	23.4439
346	0.58819	3.58382	1.3546	23.5676
345	0.58802	3.5942	1.35421	23.6906
344	0.58829	3.60465	1.35483	23.8505
343	0.58838	3.61516	1.35504	23.9971
342	0.58866	3.62573	1.35568	24.1606
341	0.58898	3.63636	1.35642	24.3289
340	0.58904	3.64706	1.35656	24.4773
339	0.5888	3.65782	1.35601	24.6019
338	0.58926	3.66864	1.35707	24.7863
337	0.5894	3.67953	1.35739	24.9455
336	0.58956	3.69048	1.35776	25.1079
335	0.58981	3.70149	1.35833	25.2793
334	0.59001	3.71257	1.35879	25.4481
333	0.58959	3.72372	1.35783	25.5648
332	0.59003	3.73494	1.35884	25.7575
331	0.58937	3.74622	1.35732	25.8554
330	0.59033	3.75758	1.35953	26.0972
329	0.59118	3.769	1.36149	26.3317
328	0.59039	3.78049	1.35967	26.4218
327	0.59084	3.79205	1.3607	26.6242
326	0.59104	3.80368	1.36117	26.8058
325	0.59059	3.81538	1.36013	26.93
324	0.59116	3.82716	1.36144	27.1488
323	0.59093	3.83901	1.36091	27.296
322	0.59257	3.85093	1.36469	27.6184
321	0.59196	3.86293	1.36328	27.7336
320	0.59275	3.875	1.3651	27.9817
319	0.58907	3.88715	1.35663	27.8089
318	0.58896	3.89937	1.35637	27.9736
317	0.58883	3.91167	1.35608	28.1379
316	0.5896	3.92405	1.35785	28.3904
315	0.58978	3.93651	1.35826	28.5885
314	0.59001	3.94904	1.35879	28.7932
313	0.59048	3.96166	1.35988	29.0237
312	0.59089	3.97436	1.36082	29.2507
311	0.59176	3.98714	1.36282	29.5258
310	0.59167	4	1.36262	29.7076
309	0.5923	4.01294	1.36407	29.9638
308	0.59275	4.02597	1.3651	30.2045
307	0.5928	4.03909	1.36522	30.4068
306	0.59392	4.05229	1.3678	30.7217
305	0.594	4.06557	1.36798	30.9317
304	0.59319	4.07895	1.36612	31.0508
303	0.59389	4.09241	1.36773	31.3298
302	0.59443	4.10596	1.36897	31.595
301	0.59482	4.1196	1.36987	31.847
300	0.59484	4.13333	1.36992	32.0618

## Sheet: S165120
S165120
Wavelength (nm)	Absorbance (arb. u.)	hν (eV)	Absorption α (cm-1)	(α hν)2 (eV cm-1)2			Geometrical factor:		2.303	cm-1
1100	0.13058	1.12727	0.300726	0.11492
1099	0.13089	1.1283	0.30144	0.115678
1098	0.13122	1.12933	0.3022	0.116474
1097	0.13148	1.13036	0.302798	0.11715
1096	0.13187	1.13139	0.303697	0.11806
1095	0.13217	1.13242	0.304388	0.118814
1094	0.13243	1.13346	0.304986	0.119501
1093	0.13266	1.13449	0.305516	0.120135
1092	0.13297	1.13553	0.30623	0.120918
1091	0.13332	1.13657	0.307036	0.121779
1090	0.13367	1.13761	0.307842	0.122643
1089	0.13393	1.13866	0.308441	0.123348
1088	0.13422	1.13971	0.309109	0.124111
1087	0.13452	1.14075	0.3098	0.124894
1086	0.13479	1.1418	0.310421	0.125627
1085	0.13513	1.14286	0.311204	0.126496
1084	0.13546	1.14391	0.311964	0.127348
1083	0.13572	1.14497	0.312563	0.128075
1082	0.13603	1.14603	0.313277	0.128899
1081	0.13635	1.14709	0.314014	0.129746
1080	0.13665	1.14815	0.314705	0.130558
1079	0.13697	1.14921	0.315442	0.131413
1078	0.13724	1.15028	0.316064	0.132177
1077	0.13755	1.15135	0.316778	0.133022
1076	0.13787	1.15242	0.317515	0.13389
1075	0.13818	1.15349	0.318229	0.134743
1074	0.13852	1.15456	0.319012	0.135658
1073	0.13884	1.15564	0.319749	0.136541
1072	0.13914	1.15672	0.320439	0.137388
1071	0.13943	1.1578	0.321107	0.138219
1070	0.13973	1.15888	0.321798	0.139073
1069	0.14003	1.15996	0.322489	0.139932
1068	0.14038	1.16105	0.323295	0.140896
1067	0.14068	1.16214	0.323986	0.141765
1066	0.14101	1.16323	0.324746	0.142698
1065	0.14148	1.16432	0.325828	0.143921
1064	0.14202	1.16541	0.327072	0.145293
1063	0.14232	1.16651	0.327763	0.146183
1062	0.14264	1.16761	0.3285	0.147118
1061	0.14297	1.16871	0.32926	0.148078
1060	0.1433	1.16981	0.33002	0.149043
1059	0.14362	1.17092	0.330757	0.149993
1058	0.14394	1.17202	0.331494	0.150946
1057	0.14426	1.17313	0.332231	0.151905
1056	0.14456	1.17424	0.332922	0.152826
1055	0.14488	1.17536	0.333659	0.153797
1054	0.14519	1.17647	0.334373	0.154747
1053	0.14555	1.17759	0.335202	0.155812
1052	0.14588	1.17871	0.335962	0.156817
1051	0.14624	1.17983	0.336791	0.157892
1050	0.14656	1.18095	0.337528	0.158885
1049	0.14691	1.18208	0.338334	0.15995
1048	0.14723	1.18321	0.339071	0.160955
1047	0.14758	1.18434	0.339877	0.16203
1046	0.1479	1.18547	0.340614	0.163044
1045	0.14823	1.1866	0.341374	0.164085
1044	0.14857	1.18774	0.342157	0.165155
1043	0.14891	1.18888	0.34294	0.166231
1042	0.1492	1.19002	0.343608	0.167199
1041	0.14959	1.19116	0.344506	0.168397
1040	0.14991	1.19231	0.345243	0.169444
1039	0.15025	1.19346	0.346026	0.170542
1038	0.15058	1.19461	0.346786	0.171623
1037	0.15095	1.19576	0.347638	0.172799
1036	0.15131	1.19691	0.348467	0.173959
1035	0.15162	1.19807	0.349181	0.175011
1034	0.15196	1.19923	0.349964	0.176137
1033	0.1523	1.20039	0.350747	0.177269
1032	0.15265	1.20155	0.351553	0.178429
1031	0.15302	1.20272	0.352405	0.179644
1030	0.15335	1.20388	0.353165	0.180768
1029	0.15372	1.20505	0.354017	0.181995
1028	0.15402	1.20623	0.354708	0.183064
1027	0.15439	1.2074	0.35556	0.184301
1026	0.15473	1.20858	0.356343	0.185476
1025	0.15508	1.20976	0.357149	0.18668
1024	0.15544	1.21094	0.357978	0.187914
1023	0.1558	1.21212	0.358807	0.189153
1022	0.15616	1.21331	0.359636	0.190402
1021	0.15653	1.2145	0.360489	0.191681
1020	0.1569	1.21569	0.361341	0.192965
1019	0.15726	1.21688	0.36217	0.194232
1018	0.1576	1.21807	0.362953	0.195454
1017	0.15799	1.21927	0.363851	0.19681
1016	0.15834	1.22047	0.364657	0.198072
1015	0.1587	1.22167	0.365486	0.199365
1014	0.15907	1.22288	0.366338	0.200693
1013	0.15944	1.22409	0.36719	0.202027
1012	0.1598	1.2253	0.368019	0.203342
1011	0.16016	1.22651	0.368848	0.204662
1010	0.16076	1.22772	0.37023	0.206606
1009	0.16127	1.22894	0.371405	0.208332
1008	0.16165	1.23016	0.37228	0.209731
1007	0.16204	1.23138	0.373178	0.211162
1006	0.16243	1.2326	0.374076	0.212601
1005	0.16281	1.23383	0.374951	0.214023
1004	0.16318	1.23506	0.375804	0.215426
1003	0.16356	1.23629	0.376679	0.216862
1002	0.16395	1.23752	0.377577	0.218331
1001	0.16433	1.23876	0.378452	0.219784
1000	0.16472	1.24	0.37935	0.221271
999	0.16513	1.24124	0.380294	0.222819
998	0.16554	1.24248	0.381239	0.224374
997	0.16594	1.24373	0.38216	0.225914
996	0.16634	1.24498	0.383081	0.227461
995	0.16672	1.24623	0.383956	0.22896
994	0.16711	1.24748	0.384854	0.230494
993	0.16753	1.24874	0.385822	0.232122
992	0.16792	1.25	0.38672	0.233675
991	0.16833	1.25126	0.387664	0.235291
990	0.16876	1.25253	0.388654	0.236975
989	0.16919	1.25379	0.389645	0.238664
988	0.16961	1.25506	0.390612	0.240337
987	0.17	1.25633	0.39151	0.241932
986	0.17041	1.25761	0.392454	0.243596
985	0.1708	1.25888	0.393352	0.245207
984	0.17123	1.26016	0.394343	0.246944
983	0.17165	1.26144	0.39531	0.248662
982	0.17207	1.26273	0.396277	0.250391
981	0.17246	1.26402	0.397175	0.252042
980	0.1729	1.26531	0.398189	0.253847
979	0.17332	1.2666	0.399156	0.255602
978	0.17376	1.26789	0.400169	0.257425
977	0.17418	1.26919	0.401137	0.259202
976	0.17462	1.27049	0.40215	0.261047
975	0.17508	1.27179	0.403209	0.262961
974	0.17549	1.2731	0.404153	0.264739
973	0.17592	1.27441	0.405144	0.266586
972	0.17634	1.27572	0.406111	0.268411
971	0.17679	1.27703	0.407147	0.270337
970	0.17723	1.27835	0.408161	0.272246
969	0.17766	1.27967	0.409151	0.274134
968	0.17813	1.28099	0.410233	0.276155
967	0.1786	1.28232	0.411316	0.278191
966	0.17904	1.28364	0.412329	0.28014
965	0.17952	1.28497	0.413435	0.282228
964	0.17999	1.28631	0.414517	0.284299
963	0.18042	1.28764	0.415507	0.28625
962	0.18088	1.28898	0.416567	0.288311
961	0.18135	1.29032	0.417649	0.290414
960	0.18182	1.29167	0.418731	0.292533
959	0.18232	1.29301	0.419883	0.294754
958	0.18279	1.29436	0.420965	0.296895
957	0.18326	1.29572	0.422048	0.299051
956	0.18374	1.29707	0.423153	0.301247
955	0.1846	1.29843	0.425134	0.304711
954	0.18518	1.29979	0.42647	0.307272
953	0.18566	1.30115	0.427575	0.309513
952	0.18615	1.30252	0.428703	0.311805
951	0.18664	1.30389	0.429832	0.314108
950	0.18714	1.30526	0.430983	0.316457
949	0.18763	1.30664	0.432112	0.31879
948	0.18812	1.30802	0.43324	0.321134
947	0.18864	1.3094	0.434438	0.323594
946	0.18913	1.31078	0.435566	0.325963
945	0.18965	1.31217	0.436764	0.328453
944	0.19013	1.31356	0.437869	0.330818
943	0.19062	1.31495	0.438998	0.333229
942	0.19116	1.31635	0.440241	0.335834
941	0.19169	1.31775	0.441462	0.338418
940	0.1922	1.31915	0.442637	0.340944
939	0.19274	1.32055	0.44388	0.343591
938	0.1933	1.32196	0.44517	0.346328
937	0.19384	1.32337	0.446414	0.34901
936	0.19438	1.32479	0.447657	0.35171
935	0.19493	1.3262	0.448924	0.354457
934	0.19549	1.32762	0.450213	0.35726
933	0.19605	1.32905	0.451503	0.360084
932	0.19663	1.33047	0.452839	0.362992
931	0.19717	1.3319	0.454083	0.365774
930	0.1977	1.33333	0.455303	0.368533
929	0.19827	1.33477	0.456616	0.371462
928	0.19885	1.33621	0.457952	0.374445
927	0.19939	1.33765	0.459195	0.377294
926	0.19996	1.33909	0.460508	0.380271
925	0.20054	1.34054	0.461844	0.383309
924	0.20113	1.34199	0.463202	0.386403
923	0.20172	1.34345	0.464561	0.389519
922	0.20231	1.3449	0.46592	0.392647
921	0.2029	1.34636	0.467279	0.395799
920	0.20351	1.34783	0.468684	0.399052
919	0.2041	1.34929	0.470042	0.402239
918	0.2047	1.35076	0.471424	0.40549
917	0.20531	1.35224	0.472829	0.408804
916	0.20591	1.35371	0.474211	0.412092
915	0.20654	1.35519	0.475662	0.415524
914	0.20714	1.35667	0.477043	0.418856
913	0.20778	1.35816	0.478517	0.422374
912	0.20844	1.35965	0.480037	0.425995
911	0.2091	1.36114	0.481557	0.429637
910	0.20975	1.36264	0.483054	0.433265
909	0.21041	1.36414	0.484574	0.436957
908	0.21105	1.36564	0.486048	0.440586
907	0.2117	1.36714	0.487545	0.444279
906	0.21235	1.36865	0.489042	0.447999
905	0.21302	1.37017	0.490585	0.451833
904	0.21368	1.37168	0.492105	0.455639
903	0.21436	1.3732	0.493671	0.459561
902	0.21503	1.37472	0.495214	0.463462
901	0.21571	1.37625	0.49678	0.467437
900	0.21635	1.37778	0.498254	0.471261
899	0.21752	1.37931	0.500949	0.47743
898	0.21813	1.38085	0.502353	0.481185
897	0.21879	1.38239	0.503873	0.485181
896	0.21946	1.38393	0.505416	0.489246
895	0.22012	1.38547	0.506936	0.493289
894	0.22082	1.38702	0.508548	0.497542
893	0.22151	1.38858	0.510138	0.501783
892	0.22218	1.39013	0.511681	0.505951
891	0.22287	1.39169	0.51327	0.510242
890	0.22355	1.39326	0.514836	0.514519
889	0.2242	1.39483	0.516333	0.518683
888	0.2249	1.3964	0.517945	0.523102
887	0.22563	1.39797	0.519626	0.527688
886	0.22631	1.39955	0.521192	0.532074
885	0.22699	1.40113	0.522758	0.536486
884	0.22769	1.40271	0.52437	0.541018
883	0.22839	1.4043	0.525982	0.545584
882	0.2291	1.4059	0.527617	0.550233
881	0.22982	1.40749	0.529275	0.55495
880	0.23049	1.40909	0.530818	0.559461
879	0.23125	1.41069	0.532569	0.564436
878	0.23197	1.4123	0.534227	0.569253
877	0.23267	1.41391	0.535839	0.574
876	0.23335	1.41553	0.537405	0.578684
875	0.23403	1.41714	0.538971	0.583387
874	0.23472	1.41876	0.54056	0.588174
873	0.23538	1.42039	0.54208	0.592846
872	0.23607	1.42202	0.543669	0.597697
871	0.23677	1.42365	0.545281	0.602626
870	0.23745	1.42529	0.546847	0.607489
869	0.23815	1.42693	0.548459	0.612483
868	0.23884	1.42857	0.550049	0.617455
867	0.23952	1.43022	0.551615	0.622411
866	0.24022	1.43187	0.553227	0.627499
865	0.24126	1.43353	0.555622	0.634413
864	0.2423	1.43519	0.558017	0.641377
863	0.24301	1.43685	0.559652	0.646635
862	0.2437	1.43852	0.561241	0.651825
861	0.2444	1.44019	0.562853	0.657098
860	0.24509	1.44186	0.564442	0.662347
859	0.2458	1.44354	0.566077	0.667743
858	0.24652	1.44522	0.567736	0.673225
857	0.24723	1.44691	0.569371	0.678693
856	0.24793	1.4486	0.570983	0.684137
855	0.24866	1.45029	0.572664	0.689778
854	0.24938	1.45199	0.574322	0.695406
853	0.25008	1.45369	0.575934	0.700954
852	0.25082	1.4554	0.577638	0.706768
851	0.25158	1.45711	0.579389	0.71273
850	0.25231	1.45882	0.58107	0.718555
849	0.253	1.46054	0.582659	0.724196
848	0.25374	1.46226	0.584363	0.730155
847	0.25444	1.46399	0.585975	0.735927
846	0.25516	1.46572	0.587633	0.741848
845	0.25589	1.46746	0.589315	0.747872
844	0.25657	1.46919	0.590881	0.753625
843	0.25728	1.47094	0.592516	0.759609
842	0.25797	1.47268	0.594105	0.765496
841	0.2587	1.47444	0.595786	0.771676
840	0.25953	1.47619	0.597698	0.77848
839	0.26034	1.47795	0.599563	0.785216
838	0.26116	1.47971	0.601451	0.792053
837	0.26195	1.48148	0.603271	0.79876
836	0.26281	1.48325	0.605251	0.805936
835	0.26366	1.48503	0.607209	0.813105
834	0.26449	1.48681	0.60912	0.820195
833	0.26527	1.4886	0.610917	0.827028
832	0.26608	1.49038	0.612782	0.834077
831	0.26692	1.49218	0.614717	0.841381
830	0.26766	1.49398	0.616421	0.848095
829	0.26852	1.49578	0.618402	0.855611
828	0.26928	1.49758	0.620152	0.862534
827	0.27002	1.4994	0.621856	0.86939
826	0.2708	1.50121	0.623652	0.876533
825	0.27155	1.50303	0.62538	0.883533
824	0.27229	1.50485	0.627084	0.890508
823	0.2731	1.50668	0.628949	0.897994
822	0.27392	1.50852	0.630838	0.905602
821	0.27466	1.51035	0.632542	0.912712
820	0.27547	1.5122	0.634407	0.920354
819	0.27629	1.51404	0.636296	0.928096
818	0.27708	1.51589	0.638115	0.935693
817	0.27791	1.51775	0.640027	0.943619
816	0.27871	1.51961	0.641869	0.951387
815	0.27953	1.52147	0.643758	0.959338
814	0.28043	1.52334	0.64583	0.9679
813	0.28128	1.52522	0.647788	0.976181
812	0.28209	1.52709	0.649653	0.984221
811	0.28292	1.52898	0.651565	0.992473
810	0.28428	1.53086	0.654697	1.0045
809	0.28543	1.53276	0.657345	1.01516
808	0.2863	1.53465	0.659349	1.02388
807	0.28713	1.53656	0.66126	1.03239
806	0.28802	1.53846	0.66331	1.04137
805	0.28892	1.54037	0.665383	1.05049
804	0.28973	1.54229	0.667248	1.05903
803	0.29061	1.54421	0.669275	1.06812
802	0.29149	1.54613	0.671301	1.07728
801	0.29233	1.54806	0.673236	1.0862
800	0.29321	1.55	0.675263	1.09549
799	0.29409	1.55194	0.677289	1.10484
798	0.295	1.55388	0.679385	1.11447
797	0.29593	1.55583	0.681527	1.12432
796	0.29688	1.55779	0.683715	1.1344
795	0.29781	1.55975	0.685856	1.1444
794	0.29871	1.56171	0.687929	1.15422
793	0.29964	1.56368	0.690071	1.16435
792	0.30058	1.56566	0.692236	1.17464
791	0.30147	1.56764	0.694285	1.18459
790	0.30235	1.56962	0.696312	1.19453
789	0.30328	1.57161	0.698454	1.20494
788	0.30421	1.5736	0.700596	1.21541
787	0.30512	1.5756	0.702691	1.2258
786	0.30602	1.57761	0.704764	1.23619
785	0.30697	1.57962	0.706952	1.24705
784	0.30792	1.58163	0.70914	1.25798
783	0.30882	1.58365	0.711212	1.26858
782	0.30979	1.58568	0.713446	1.27983
781	0.31071	1.58771	0.715565	1.29075
780	0.3117	1.58974	0.717845	1.30231
779	0.31261	1.59178	0.719941	1.31329
778	0.31357	1.59383	0.722152	1.32477
777	0.31445	1.59588	0.724178	1.33565
776	0.31548	1.59794	0.72655	1.34788
775	0.31638	1.6	0.728623	1.35908
774	0.31741	1.60207	0.730995	1.37149
773	0.31836	1.60414	0.733183	1.38328
772	0.31937	1.60622	0.735509	1.39568
771	0.32029	1.6083	0.737628	1.40737
770	0.32133	1.61039	0.740023	1.42021
769	0.32227	1.61248	0.742188	1.43224
768	0.32328	1.61458	0.744514	1.44499
767	0.32424	1.61669	0.746725	1.45739
766	0.32517	1.6188	0.748867	1.46959
765	0.3262	1.62092	0.751239	1.48279
764	0.3272	1.62304	0.753542	1.4958
763	0.32815	1.62516	0.755729	1.50843
762	0.32912	1.6273	0.757963	1.52136
761	0.33013	1.62943	0.760289	1.53472
760	0.33113	1.63158	0.762592	1.54811
759	0.33213	1.63373	0.764895	1.56158
758	0.33313	1.63588	0.767198	1.57514
757	0.33411	1.63804	0.769455	1.5886
756	0.33501	1.64021	0.771528	1.60141
755	0.33675	1.64238	0.775535	1.62237
754	0.338	1.64456	0.778414	1.63878
753	0.33901	1.64675	0.78074	1.65298
752	0.34001	1.64894	0.783043	1.66717
751	0.34102	1.65113	0.785369	1.68155
750	0.34206	1.65333	0.787764	1.69633
749	0.34309	1.65554	0.790136	1.71113
748	0.34414	1.65775	0.792554	1.72622
747	0.34513	1.65997	0.794834	1.74082
746	0.34615	1.6622	0.797183	1.75583
745	0.34713	1.66443	0.79944	1.77053
744	0.34814	1.66667	0.801766	1.78564
743	0.34915	1.66891	0.804092	1.80085
742	0.35018	1.67116	0.806465	1.81638
741	0.35125	1.67341	0.808929	1.83242
740	0.35229	1.67568	0.811324	1.84829
739	0.35331	1.67794	0.813673	1.86403
738	0.35431	1.68022	0.815976	1.87969
737	0.35537	1.6825	0.818417	1.89609
736	0.35639	1.68478	0.820766	1.91216
735	0.3574	1.68707	0.823092	1.92825
734	0.35843	1.68937	0.825464	1.94467
733	0.35944	1.69168	0.82779	1.961
732	0.36044	1.69399	0.830093	1.97731
731	0.36144	1.69631	0.832396	1.99375
730	0.36244	1.69863	0.834699	2.01029
729	0.36343	1.70096	0.836979	2.02683
728	0.36443	1.7033	0.839282	2.04361
727	0.36545	1.70564	0.841631	2.06072
726	0.36644	1.70799	0.843911	2.07761
725	0.36741	1.71034	0.846145	2.09438
724	0.36843	1.71271	0.848494	2.11186
723	0.36941	1.71508	0.850751	2.12899
722	0.37044	1.71745	0.853123	2.1468
721	0.37138	1.71983	0.855288	2.16369
720	0.37238	1.72222	0.857591	2.18141
719	0.37336	1.72462	0.859848	2.19903
718	0.37434	1.72702	0.862105	2.21674
717	0.37539	1.72943	0.864523	2.23542
716	0.37637	1.73184	0.86678	2.25337
715	0.37739	1.73427	0.869129	2.27197
714	0.37839	1.73669	0.871432	2.2904
713	0.3794	1.73913	0.873758	2.30912
712	0.38036	1.74157	0.875969	2.32734
711	0.38136	1.74402	0.878272	2.34618
710	0.38232	1.74648	0.880483	2.36466
709	0.38329	1.74894	0.882717	2.38338
708	0.38429	1.75141	0.88502	2.4026
707	0.3853	1.75389	0.887346	2.42209
706	0.38628	1.75637	0.889603	2.44132
705	0.38722	1.75887	0.891768	2.4602
704	0.38822	1.76136	0.894071	2.47993
703	0.38918	1.76387	0.896282	2.49932
702	0.39009	1.76638	0.898377	2.51817
701	0.39095	1.7689	0.900358	2.53651
700	0.39192	1.77143	0.902592	2.55641
699	0.39317	1.77396	0.905471	2.5801
698	0.39411	1.7765	0.907635	2.59988
697	0.39504	1.77905	0.909777	2.61967
696	0.396	1.78161	0.911988	2.64
695	0.39692	1.78417	0.914107	2.65991
694	0.39784	1.78674	0.916226	2.67995
693	0.39879	1.78932	0.918413	2.70055
692	0.39974	1.79191	0.920601	2.72129
691	0.40065	1.7945	0.922697	2.74161
690	0.40213	1.7971	0.926105	2.76991
689	0.40344	1.79971	0.929122	2.79609
688	0.40436	1.80233	0.931241	2.81704
687	0.40529	1.80495	0.933383	2.83825
686	0.40624	1.80758	0.935571	2.85988
685	0.40717	1.81022	0.937713	2.88139
684	0.40811	1.81287	0.939877	2.90319
683	0.40903	1.81552	0.941996	2.92483
682	0.40994	1.81818	0.944092	2.94647
681	0.41086	1.82085	0.946211	2.96841
680	0.41173	1.82353	0.948214	2.98978
679	0.41262	1.82622	0.950264	3.01158
678	0.41352	1.82891	0.952337	3.03365
677	0.41442	1.83161	0.954409	3.05587
676	0.41532	1.83432	0.956482	3.07825
675	0.41624	1.83704	0.958601	3.10108
674	0.41715	1.83976	0.960696	3.12388
673	0.41804	1.8425	0.962746	3.14658
672	0.41892	1.84524	0.964773	3.16924
671	0.41978	1.84799	0.966753	3.19176
670	0.42065	1.85075	0.968757	3.21459
669	0.42153	1.85351	0.970784	3.23769
668	0.42241	1.85629	0.97281	3.26098
667	0.42329	1.85907	0.974837	3.28439
666	0.42419	1.86186	0.97691	3.30828
665	0.42507	1.86466	0.978936	3.33202
664	0.42596	1.86747	0.980986	3.35608
663	0.42685	1.87029	0.983036	3.38031
662	0.42774	1.87311	0.985085	3.40466
661	0.42861	1.87595	0.987089	3.4289
660	0.42947	1.87879	0.989069	3.45311
659	0.43032	1.88164	0.991027	3.47731
658	0.43118	1.8845	0.993008	3.50185
657	0.43209	1.88737	0.995103	3.52737
656	0.43296	1.89024	0.997107	3.55236
655	0.43383	1.89313	0.99911	3.57757
654	0.43471	1.89602	1.00114	3.60307
653	0.43554	1.89893	1.00305	3.62795
652	0.43643	1.90184	1.0051	3.65397
651	0.43725	1.90476	1.00699	3.67899
650	0.4381	1.90769	1.00894	3.70467
649	0.43891	1.91063	1.01081	3.72986
648	0.43978	1.91358	1.01281	3.75623
647	0.4406	1.91654	1.0147	3.78192
646	0.44144	1.9195	1.01664	3.80809
645	0.44225	1.92248	1.0185	3.83396
644	0.44304	1.92547	1.02032	3.85964
643	0.4439	1.92846	1.0223	3.88669
642	0.44478	1.93146	1.02433	3.91426
641	0.4456	1.93448	1.02622	3.941
640	0.44642	1.9375	1.02811	3.96788
639	0.44725	1.94053	1.03002	3.99512
638	0.4481	1.94357	1.03197	4.02289
637	0.44888	1.94662	1.03377	4.04959
636	0.44967	1.94969	1.03559	4.07668
635	0.45049	1.95276	1.03748	4.10446
634	0.45202	1.95584	1.041	4.14543
633	0.45291	1.95893	1.04305	4.17493
632	0.45371	1.96203	1.04489	4.20297
631	0.45456	1.96513	1.04685	4.23207
630	0.45536	1.96825	1.04869	4.26048
629	0.45616	1.97138	1.05054	4.28907
628	0.45691	1.97452	1.05226	4.3169
627	0.45771	1.97767	1.05411	4.34587
626	0.45849	1.98083	1.0559	4.37464
625	0.45927	1.984	1.0577	4.40359
624	0.46005	1.98718	1.0595	4.43274
623	0.46083	1.99037	1.06129	4.46208
622	0.46158	1.99357	1.06302	4.49102
621	0.46232	1.99678	1.06472	4.51995
620	0.46308	2	1.06647	4.54946
619	0.46386	2.00323	1.06827	4.57956
618	0.46462	2.00647	1.07002	4.60945
617	0.46539	2.00972	1.07179	4.63973
616	0.46612	2.01299	1.07347	4.66946
615	0.46684	2.01626	1.07513	4.69913
614	0.46759	2.01954	1.07686	4.72959
613	0.46834	2.02284	1.07859	4.76029
612	0.46909	2.02614	1.08031	4.79114
611	0.46982	2.02946	1.082	4.82183
610	0.47054	2.03279	1.08365	4.85251
609	0.47127	2.03612	1.08533	4.88353
608	0.47203	2.03947	1.08709	4.91543
607	0.47277	2.04283	1.08879	4.94712
606	0.47349	2.0462	1.09045	4.97858
605	0.47423	2.04959	1.09215	5.01072
604	0.47496	2.05298	1.09383	5.0428
603	0.4757	2.05638	1.09554	5.07529
602	0.47641	2.0598	1.09717	5.1074
601	0.47711	2.06323	1.09878	5.13949
600	0.47783	2.06667	1.10044	5.17222
599	0.47851	2.07012	1.10201	5.20428
598	0.4792	2.07358	1.1036	5.23677
597	0.4799	2.07705	1.10521	5.26967
596	0.48058	2.08054	1.10678	5.30239
595	0.48127	2.08403	1.10836	5.33548
594	0.48192	2.08754	1.10986	5.36794
593	0.48259	2.09106	1.1114	5.40104
592	0.48328	2.09459	1.11299	5.4348
591	0.48394	2.09814	1.11451	5.46814
590	0.48463	2.10169	1.1161	5.50232
589	0.48526	2.10526	1.11755	5.53539
588	0.48594	2.10884	1.11912	5.56981
587	0.48658	2.11244	1.12059	5.60357
586	0.48729	2.11604	1.12223	5.63911
585	0.48793	2.11966	1.1237	5.67329
584	0.48858	2.12329	1.1252	5.70792
583	0.48922	2.12693	1.12667	5.74252
582	0.48988	2.13058	1.12819	5.77781
581	0.49051	2.13425	1.12964	5.81265
580	0.49128	2.13793	1.13142	5.85104
579	0.49249	2.14162	1.1342	5.90021
578	0.49312	2.14533	1.13566	5.93583
577	0.49378	2.14905	1.13718	5.97239
576	0.49441	2.15278	1.13863	6.00844
575	0.49506	2.15652	1.14012	6.0452
574	0.49575	2.16028	1.14171	6.08322
573	0.49629	2.16405	1.14296	6.11778
572	0.4969	2.16783	1.14436	6.15427
571	0.49753	2.17163	1.14581	6.19153
570	0.49812	2.17544	1.14717	6.22802
569	0.4987	2.17926	1.14851	6.26448
568	0.49939	2.1831	1.1501	6.30398
567	0.4999	2.18695	1.15127	6.33916
566	0.50049	2.19081	1.15263	6.37658
565	0.50104	2.19469	1.1539	6.41326
564	0.50164	2.19858	1.15528	6.45144
563	0.50226	2.20249	1.1567	6.49042
562	0.50277	2.20641	1.15788	6.52678
561	0.50328	2.21034	1.15905	6.56335
560	0.50392	2.21429	1.16053	6.60359
559	0.50442	2.21825	1.16168	6.64039
558	0.50499	2.22222	1.16299	6.67925
557	0.50559	2.22621	1.16437	6.71919
556	0.50606	2.23022	1.16546	6.75596
555	0.50665	2.23423	1.16681	6.7961
554	0.50718	2.23827	1.16804	6.83498
553	0.50768	2.24231	1.16919	6.8732
552	0.50818	2.24638	1.17034	6.91177
551	0.50869	2.25045	1.17151	6.95077
550	0.5092	2.25455	1.17269	6.99012
549	0.50967	2.25865	1.17377	7.02852
548	0.51012	2.26277	1.17481	7.06665
547	0.51065	2.26691	1.17603	7.10727
546	0.51113	2.27106	1.17713	7.14674
545	0.51163	2.27523	1.17828	7.18705
544	0.51214	2.27941	1.17946	7.22787
543	0.51257	2.28361	1.18045	7.26671
542	0.51302	2.28782	1.18149	7.30634
541	0.51348	2.29205	1.18254	7.34654
540	0.5139	2.2963	1.18351	7.38588
539	0.5143	2.30056	1.18443	7.42486
538	0.51473	2.30483	1.18542	7.46491
537	0.51514	2.30912	1.18637	7.50467
536	0.51554	2.31343	1.18729	7.54441
535	0.51594	2.31776	1.18821	7.58443
534	0.51636	2.3221	1.18918	7.62526
533	0.51675	2.32645	1.19008	7.66543
532	0.51717	2.33083	1.19104	7.70683
531	0.51754	2.33522	1.19189	7.74696
530	0.51792	2.33962	1.19277	7.7876
529	0.51833	2.34405	1.19371	7.82951
528	0.51872	2.34848	1.19461	7.87096
527	0.51909	2.35294	1.19546	7.91216
526	0.51943	2.35741	1.19625	7.95266
525	0.51997	2.3619	1.19749	7.99959
524	0.52048	2.36641	1.19867	8.04592
523	0.5208	2.37094	1.1994	8.08669
522	0.52108	2.37548	1.20005	8.12642
521	0.52139	2.38004	1.20076	8.16736
520	0.52172	2.38462	1.20152	8.20921
519	0.52201	2.38921	1.20219	8.25
518	0.52225	2.39382	1.20274	8.28949
517	0.52249	2.39845	1.20329	8.32924
516	0.52274	2.4031	1.20387	8.36957
515	0.52297	2.40777	1.2044	8.40952
514	0.52318	2.41245	1.20488	8.44903
513	0.52338	2.41715	1.20534	8.48847
512	0.52363	2.42188	1.20592	8.52987
511	0.52392	2.42661	1.20659	8.5727
510	0.5242	2.43137	1.20723	8.61557
509	0.52448	2.43615	1.20788	8.65872
508	0.52476	2.44094	1.20852	8.70209
507	0.525	2.44576	1.20908	8.74448
506	0.52519	2.45059	1.20951	8.78541
505	0.5254	2.45545	1.21	8.82735
504	0.52557	2.46032	1.21039	8.86813
503	0.52578	2.46521	1.21087	8.91054
502	0.52589	2.47012	1.21112	8.94981
501	0.52599	2.47505	1.21135	8.98899
500	0.52618	2.48	1.21179	9.0315
499	0.52633	2.48497	1.21214	9.07291
498	0.52648	2.48996	1.21248	9.11457
497	0.5266	2.49497	1.21276	9.15546
496	0.52676	2.5	1.21313	9.198
495	0.52697	2.50505	1.21361	9.24256
494	0.52711	2.51012	1.21393	9.28495
493	0.52723	2.51521	1.21421	9.32688
492	0.52744	2.52033	1.21469	9.37236
491	0.52754	2.52546	1.21492	9.41412
490	0.52762	2.53061	1.21511	9.45542
489	0.5278	2.53579	1.21552	9.50065
488	0.52793	2.54098	1.21582	9.54428
487	0.52802	2.5462	1.21603	9.5868
486	0.52818	2.55144	1.2164	9.63213
485	0.52817	2.5567	1.21638	9.67152
484	0.52838	2.56198	1.21686	9.71924
483	0.52842	2.56729	1.21695	9.76104
482	0.52858	2.57261	1.21732	9.80748
481	0.5286	2.57796	1.21737	9.84905
480	0.52869	2.58333	1.21757	9.8935
479	0.52876	2.58873	1.21773	9.93753
478	0.52886	2.59414	1.21796	9.98289
477	0.52903	2.59958	1.21836	10.0312
476	0.52904	2.60504	1.21838	10.0738
475	0.52929	2.61053	1.21895	10.1259
474	0.52932	2.61603	1.21902	10.1697
473	0.52939	2.62156	1.21919	10.2155
472	0.52948	2.62712	1.21939	10.2623
471	0.52957	2.6327	1.2196	10.3095
470	0.52968	2.6383	1.21985	10.3577
469	0.53006	2.64392	1.22073	10.4168
468	0.53021	2.64957	1.22107	10.4673
467	0.53031	2.65525	1.2213	10.5162
466	0.53039	2.66094	1.22149	10.5645
465	0.53051	2.66667	1.22176	10.6148
464	0.53062	2.67241	1.22202	10.665
463	0.53068	2.67819	1.22216	10.7136
462	0.53087	2.68398	1.22259	10.7677
461	0.53099	2.6898	1.22287	10.8193
460	0.53101	2.69565	1.22292	10.8673
459	0.5311	2.70153	1.22312	10.9184
458	0.53125	2.70742	1.22347	10.9723
457	0.53142	2.71335	1.22386	11.0275
456	0.53153	2.7193	1.22411	11.0805
455	0.53164	2.72527	1.22437	11.1338
454	0.53179	2.73128	1.22471	11.1892
453	0.53184	2.73731	1.22483	11.2408
452	0.53195	2.74336	1.22508	11.2952
451	0.53207	2.74945	1.22536	11.3506
450	0.5321	2.75556	1.22543	11.4023
449	0.53215	2.76169	1.22554	11.4553
448	0.53226	2.76786	1.22579	11.5113
447	0.5323	2.77405	1.22589	11.5646
446	0.53232	2.78027	1.22593	11.6174
445	0.53239	2.78652	1.22609	11.6727
444	0.53248	2.79279	1.2263	11.7293
443	0.53259	2.7991	1.22655	11.7872
442	0.53264	2.80543	1.22667	11.8428
441	0.53263	2.81179	1.22665	11.8961
440	0.53269	2.81818	1.22679	11.9529
439	0.53275	2.8246	1.22692	12.0102
438	0.53286	2.83105	1.22718	12.0701
437	0.5329	2.83753	1.22727	12.1272
436	0.53298	2.84404	1.22745	12.1866
435	0.53304	2.85057	1.22759	12.2453
434	0.533	2.85714	1.2275	12.3
433	0.53297	2.86374	1.22743	12.3555
432	0.53298	2.87037	1.22745	12.4132
431	0.53297	2.87703	1.22743	12.4705
430	0.53308	2.88372	1.22768	12.5337
429	0.53296	2.89044	1.22741	12.5865
428	0.53293	2.8972	1.22734	12.644
427	0.53302	2.90398	1.22755	12.7076
426	0.53302	2.9108	1.22755	12.7673
425	0.53302	2.91765	1.22755	12.8275
424	0.53289	2.92453	1.22725	12.8818
423	0.53277	2.93144	1.22697	12.9369
422	0.53274	2.93839	1.2269	12.9968
421	0.53274	2.94537	1.2269	13.0586
420	0.53271	2.95238	1.22683	13.1194
419	0.53253	2.95943	1.22642	13.1732
418	0.53254	2.96651	1.22644	13.2368
417	0.5325	2.97362	1.22635	13.2984
416	0.53236	2.98077	1.22603	13.3554
415	0.53217	2.98795	1.22559	13.4102
414	0.53218	2.99517	1.22561	13.4756
413	0.53196	3.00242	1.2251	13.5297
412	0.53206	3.00971	1.22533	13.6006
411	0.53189	3.01703	1.22494	13.6581
410	0.53177	3.02439	1.22467	13.7186
409	0.53167	3.03178	1.22444	13.7806
408	0.53146	3.03922	1.22395	13.8374
407	0.53132	3.04668	1.22363	13.8981
406	0.53116	3.05419	1.22326	13.9582
405	0.53113	3.06173	1.22319	14.0257
404	0.53079	3.06931	1.22241	14.0772
403	0.53068	3.07692	1.22216	14.1412
402	0.53048	3.08458	1.2217	14.201
401	0.53042	3.09227	1.22156	14.2686
400	0.52995	3.1	1.22047	14.3147
399	0.52988	3.10777	1.22031	14.3827
398	0.5298	3.11558	1.22013	14.4507
397	0.52959	3.12343	1.21965	14.5121
396	0.52932	3.13131	1.21902	14.5706
395	0.52903	3.13924	1.21836	14.6284
394	0.52889	3.14721	1.21803	14.695
393	0.52854	3.15522	1.21723	14.7504
392	0.52854	3.16327	1.21723	14.8257
391	0.52818	3.17136	1.2164	14.8814
390	0.52801	3.17949	1.21601	14.9481
389	0.52789	3.18766	1.21573	15.0182
388	0.52769	3.19588	1.21527	15.0843
387	0.52746	3.20413	1.21474	15.1491
386	0.52718	3.21244	1.2141	15.2116
385	0.52677	3.22078	1.21315	15.2669
384	0.5267	3.22917	1.21299	15.3425
383	0.5263	3.2376	1.21207	15.3993
382	0.52605	3.24607	1.21149	15.4653
381	0.52577	3.25459	1.21085	15.53
380	0.5254	3.26316	1.21	15.59
379	0.52544	3.27177	1.21009	15.6747
378	0.52524	3.28042	1.20963	15.7457
377	0.52483	3.28912	1.20868	15.8046
376	0.52439	3.29787	1.20767	15.8622
375	0.52412	3.30667	1.20705	15.9306
374	0.52423	3.31551	1.2073	16.0226
373	0.52355	3.3244	1.20574	16.0669
372	0.52315	3.33333	1.20481	16.1286
371	0.52301	3.34232	1.20449	16.207
370	0.52299	3.35135	1.20445	16.2935
369	0.52247	3.36043	1.20325	16.3493
368	0.52228	3.36957	1.20281	16.4264
367	0.52178	3.37875	1.20166	16.4845
366	0.52129	3.38798	1.20053	16.5435
365	0.52086	3.39726	1.19954	16.6069
364	0.52066	3.40659	1.19908	16.6854
363	0.52048	3.41598	1.19867	16.7659
362	0.52007	3.42541	1.19772	16.832
361	0.51989	3.4349	1.19731	16.9137
360	0.51943	3.44444	1.19625	16.9777
359	0.51933	3.45404	1.19602	17.0659
358	0.5192	3.46369	1.19572	17.1528
357	0.51892	3.47339	1.19507	17.2304
356	0.51862	3.48315	1.19438	17.3074
355	0.51851	3.49296	1.19413	17.3976
354	0.51829	3.50282	1.19362	17.4811
353	0.5178	3.51275	1.19249	17.5471
352	0.51797	3.52273	1.19288	17.6586
351	0.51757	3.53276	1.19196	17.7319
350	0.51735	3.54286	1.19146	17.8182
349	0.51663	3.55301	1.1898	17.8706
348	0.5167	3.56322	1.18996	17.9784
347	0.5167	3.57349	1.18996	18.0821
346	0.51608	3.58382	1.18853	18.1432
345	0.51602	3.5942	1.18839	18.2442
344	0.51609	3.60465	1.18856	18.3554
343	0.51539	3.61516	1.18694	18.4126
342	0.5155	3.62573	1.1872	18.5283
341	0.51565	3.63636	1.18754	18.648
340	0.51478	3.64706	1.18554	18.6946
339	0.515	3.65782	1.18605	18.8212
338	0.51458	3.66864	1.18508	18.9018
337	0.51466	3.67953	1.18526	19.0201
336	0.51453	3.69048	1.18496	19.1238
335	0.51436	3.70149	1.18457	19.2254
334	0.51413	3.71257	1.18404	19.3234
333	0.51411	3.72372	1.184	19.4381
332	0.51365	3.73494	1.18294	19.5204
331	0.51346	3.74622	1.1825	19.624
330	0.5134	3.75758	1.18236	19.7386
329	0.51339	3.769	1.18234	19.858
328	0.51404	3.78049	1.18383	20.0299
327	0.5135	3.79205	1.18259	20.1102
326	0.51252	3.80368	1.18033	20.1566
325	0.51319	3.81538	1.18188	20.3339
324	0.5134	3.82716	1.18236	20.4764
323	0.51285	3.83901	1.18109	20.5592
322	0.51257	3.85093	1.18045	20.6645
321	0.51399	3.86293	1.18372	20.9089
320	0.51231	3.875	1.17985	20.9024
319	0.50897	3.88715	1.17216	20.7604
318	0.50884	3.89937	1.17186	20.8804
317	0.50969	3.91167	1.17382	21.0826
316	0.50961	3.92405	1.17363	21.2096
315	0.5096	3.93651	1.17361	21.3437
314	0.50965	3.94904	1.17372	21.484
313	0.50947	3.96166	1.17331	21.6063
312	0.50943	3.97436	1.17322	21.7416
311	0.51026	3.98714	1.17513	21.953
310	0.50954	4	1.17347	22.0325
309	0.5096	4.01294	1.17361	22.1805
308	0.51031	4.02597	1.17524	22.3871
307	0.51015	4.03909	1.17488	22.5191
306	0.51085	4.05229	1.17649	22.7288
305	0.51072	4.06557	1.17619	22.8663
304	0.51056	4.07895	1.17582	23.0027
303	0.51119	4.09241	1.17727	23.2119
302	0.511	4.10596	1.17683	23.3485
301	0.51053	4.1196	1.17575	23.4607
300	0.51088	4.13333	1.17656	23.6497
